# Supplementary material for: Field comparison of dry deposition samplers for collection of atmospheric mineral dust: results from single-particle characterization
Source: Copernicus journal article supplement (doi:10.5194/amt-2019-187), 2019-05-14
Supplement: Supplementary file 1 [file amt-2019-187-supplement.pdf]

# “Field comparison of dry deposition samplers for collection of atmospheric mineral dust: results from single-particle characterization”

**A. WAZA<sup>1,\*</sup>, K. SCHNEIDERS<sup>1</sup>, J. MAY<sup>2</sup>, S. RODRÍGUEZ<sup>3,4</sup>, B. EPPLE<sup>2</sup>, K. KANDLER<sup>1</sup>**

<sup>1</sup>Atmospheric Aerosol, Institute for Applied Geosciences, Technische Universität Darmstadt, D-64287 Darmstadt, Germany

<sup>2</sup>Institute for Energy Systems & Technology, Technische Universität Darmstadt, D-64287 Darmstadt, Germany

<sup>3</sup>Izaña Atmospheric Research Centre, AEMET, Tenerife, Spain.

<sup>4</sup>Estación Experimental de Zonas Áridas, EEZA CSIC, Almería, Spain.

\*correspondence to [andebo.waza@geo.tu-darmstadt.de](mailto:andebo.waza@geo.tu-darmstadt.de)

## 1 Measurement

**Table S 1:** Minimum, Maximum and Median Mass Flux (**mg/(m<sup>2</sup>d)**) measured by **Vertical deposition samplers**. Mass Flux in each size interval is also shown.

FP=Flat plate, Sig=Sigma-2

| Samp. Id. | Date     | Temp (°C) | Wind speed (m/s) | Mass flux (mg/(m <sup>2</sup> d))    |        |         |         |         |         |
|-----------|----------|-----------|------------------|--------------------------------------|--------|---------|---------|---------|---------|
|           |          |           |                  | Size interval (aerodynamic diameter) |        |         |         |         |         |
|           |          |           |                  | 1-2µm                                | 2-4µm  | 4-8µm   | 8-16µm  | 16-32µm | 32-64µm |
| FP        | 02.08.17 | 15.997    | 2.055            | 0.0125                               | 0.0332 | 0.1591  | 0.6915  | 1.0487  | 0       |
| FP        | 03.08.17 | 16.832    | 2.182            | 0.0178                               | 0.085  | 0.4457  | 3.1786  | 3.5723  | 12.2381 |
| FP        | 09.08.17 | 22.064    | 3.045            | 0.2318                               | 2.5612 | 12.1382 | 22.3694 | 17.5472 | 0       |
| FP        | 10.08.17 | 22.041    | 2.694            | 0.1268                               | 1.7105 | 7.6181  | 14.3374 | 10.8418 | 7.2271  |
| FP        | 20.08.17 | 23.049    | 2.321            | 0.0587                               | 0.9965 | 7.7644  | 31.8469 | 39.2924 | 0       |
| FP        | 21.08.17 | 22.127    | 1.991            | 0.0625                               | 1.2487 | 9.9323  | 29.9751 | 22.0631 | 0       |
| FP        | 22.08.17 | 21.126    | 3.011            | 0.0413                               | 1.0977 | 8.4911  | 16.1487 | 9.563   | 0       |
| FP        | 16.07.17 | 21.407    | 1.687            | 0.1512                               | 1.6673 | 5.8333  | 10.3739 | 6.789   | 0       |
| FP        | 18.07.17 | 19.863    | 3.289            | 0.0773                               | 1.0835 | 4.3797  | 5.3431  | 4.4326  | 0       |
| FP        | 19.07.17 | 17.691    | 4.275            | 0.0191                               | 0.2874 | 1.4257  | 2.5807  | 0.7248  | 0       |

|     |          |        |       |        |        |         |         |         |         |
|-----|----------|--------|-------|--------|--------|---------|---------|---------|---------|
| FP  | 20.07.17 | 15.915 | 4.620 | 0.0084 | 0.0437 | 0.3936  | 1.7336  | 2.0418  | 0       |
| FP  | 24.07.17 | 20.758 | 3.883 | 0.1656 | 2.1236 | 8.9983  | 13.6345 | 2.7224  | 0       |
| FP  | 25.07.17 | 20.784 | 2.055 | 0.1468 | 1.5641 | 6.7421  | 11.8483 | 0.7455  | 0       |
| FP  | 26.07.17 | 20.989 | 2.550 | 0.0819 | 1.0551 | 5.0441  | 7.0303  | 1.8159  | 0       |
| FP  | 27.07.17 | 21.563 | 2.092 | 0.1272 | 1.3325 | 6.6209  | 5.5919  | 0.8894  | 0       |
| FP  | 28.07.17 | 22.325 | 2.318 | 0.0912 | 1.2328 | 4.7233  | 4.0095  | 1.9389  | 0       |
| FP  | 29.07.17 | 21.971 | 4.438 | 0.0145 | 0.0798 | 0.5085  | 0.7329  | 1.9062  | 0       |
| FP  | 30.07.17 | 19.823 | 4.874 | 0.08   | 0.2918 | 1.2003  | 1.9713  | 0       | 0       |
| Sig | 02.08.17 | 15.997 | 2.055 | 0.0133 | 0.0435 | 0.3232  | 1.4541  | 1.1561  | 0       |
| Sig | 03.08.17 | 16.832 | 2.182 | 0.0117 | 0.0637 | 0.2629  | 0.7752  | 0.7638  | 0       |
| Sig | 04.08.17 | 18.734 | 3.251 | 0.0537 | 0.2111 | 0.6742  | 0.9907  | 0.2664  | 0       |
| Sig | 09.08.17 | 22.064 | 3.045 | 0.2747 | 3.2314 | 12.3996 | 21.4241 | 7.4674  | 0       |
| Sig | 10.08.17 | 22.041 | 2.694 | 0.1171 | 1.312  | 4.7166  | 7.9581  | 1.4412  | 0       |
| Sig | 11.08.17 | 20.230 | 4.490 | 0.0506 | 0.3731 | 1.4438  | 3.2957  | 3.822   | 5.9832  |
| Sig | 12.08.17 | 18.666 | 4.551 | 0.0435 | 0.3212 | 1.0996  | 2.4052  | 2.1606  | 0       |
| Sig | 14.08.17 | 19.269 | 5.154 | 0.0929 | 0.6751 | 2.6105  | 5.3232  | 6.6811  | 0       |
| Sig | 15.08.17 | 19.918 | 1.855 | 0.0113 | 0.0581 | 0.2661  | 0.384   | 1.164   | 0       |
| Sig | 16.08.17 | 22.284 | 1.523 | 0.1003 | 0.973  | 3.507   | 5.4434  | 4.8978  | 0       |
| Sig | 17.08.17 | 21.384 | 2.978 | 0.1022 | 0.6704 | 2.382   | 4.9459  | 4.6931  | 0       |
| Sig | 18.08.17 | 20.574 | 3.080 | 0.0423 | 0.2089 | 0.7355  | 1.606   | 1.455   | 0       |
| Sig | 19.08.17 | 22.836 | 2.388 | 0.0337 | 0.2013 | 0.9165  | 2.0097  | 2.0509  | 0       |
| Sig | 20.08.17 | 23.049 | 2.321 | 0.2254 | 2.5137 | 12.8442 | 44.6417 | 42.0205 | 11.7559 |
| Sig | 21.08.17 | 22.127 | 1.991 | 0.3337 | 4.1199 | 20.8917 | 48.5994 | 36.6512 | 6.6514  |
| Sig | 22.08.17 | 21.126 | 3.011 | 0.2849 | 3.5102 | 16.3368 | 35.5797 | 17.1256 | 0       |
| Sig | 20.07.17 | 15.915 | 4.620 | 0.0102 | 0.0431 | 0.2539  | 1.8245  | 2.4863  | 0       |
| Sig | 21.07.17 | 14.153 | 3.830 | 0.0093 | 0.0405 | 0.1077  | 0.5439  | 0       | 0       |
| Sig | 26.07.17 | 20.989 | 2.550 | 0.1704 | 2.0074 | 8.3447  | 11.0216 | 3.496   | 0       |
| Sig | 27.07.17 | 21.563 | 2.092 | 0.1692 | 2.3802 | 10.0826 | 9.6501  | 4.2398  | 0       |
| Sig | 28.07.17 | 22.325 | 2.318 | 0.2126 | 2.3481 | 9.5403  | 10.2896 | 1.9448  | 0       |
| Sig | 29.07.17 | 21.971 | 4.438 | 0.1927 | 2.1052 | 8.1321  | 8.5173  | 1.0481  | 0       |
| Sig | 30.07.17 | 19.823 | 4.874 | 0.4671 | 1.2559 | 2.7535  | 4.3127  | 6.5318  | 0       |

**Table S 2:** Minimum, Maximum and Median Daily basis Number Flux (1/(m<sup>2</sup> d)) measured by **Vertical deposition samplers**. Mass Flux in each size interval is also shown.

FP=Flat plate, Sig=Sigma-2

| Samp . Id. | Date     | Temp (°C) | Wind speed (m/s) | Number Flux 1/(m <sup>2</sup> d)     |          |          |          |          |          |
|------------|----------|-----------|------------------|--------------------------------------|----------|----------|----------|----------|----------|
|            |          |           |                  | Size interval (aerodynamic diameter) |          |          |          |          |          |
|            |          |           |                  | 1-2µm                                | 2-4µm    | 4-8µm    | 8-16µm   | 16-32µm  | 32-64µm  |
| FP         | 02.08.17 | 15.997    | 2.055            | 2.64E+06                             | 9.95E+05 | 6.99E+05 | 2.69E+05 | 2.70E+05 | 0        |
| FP         | 03.08.17 | 16.832    | 2.182            | 4.22E+06                             | 2.39E+06 | 1.43E+06 | 1.14E+06 | 1.99E+05 | 8.50E+04 |
| FP         | 09.08.17 | 22.064    | 3.045            | 4.12E+07                             | 6.57E+07 | 4.39E+07 | 1.10E+07 | 8.10E+05 | 0        |
| FP         | 10.08.17 | 22.041    | 2.694            | 2.17E+07                             | 4.28E+07 | 2.70E+07 | 6.87E+06 | 6.30E+05 | 4.00E+04 |
| FP         | 20.08.17 | 23.049    | 2.321            | 9.70E+06                             | 2.33E+07 | 2.49E+07 | 1.20E+07 | 2.79E+06 | 0        |
| FP         | 21.08.17 | 22.127    | 1.991            | 9.52E+06                             | 2.87E+07 | 3.42E+07 | 1.35E+07 | 1.66E+06 | 0        |
| FP         | 22.08.17 | 21.126    | 3.011            | 6.48E+06                             | 2.43E+07 | 2.87E+07 | 7.87E+06 | 5.40E+05 | 0        |
| FP         | 16.07.17 | 21.407    | 1.687            | 2.72E+07                             | 4.26E+07 | 2.25E+07 | 5.69E+06 | 4.40E+05 | 0        |
| FP         | 18.07.17 | 19.863    | 3.289            | 1.33E+07                             | 2.74E+07 | 1.66E+07 | 3.02E+06 | 3.20E+05 | 0        |
| FP         | 19.07.17 | 17.691    | 4.275            | 3.34E+06                             | 6.59E+06 | 4.97E+06 | 1.32E+06 | 8.40E+04 | 0        |
| FP         | 20.07.17 | 15.915    | 4.620            | 1.80E+06                             | 1.34E+06 | 1.27E+06 | 6.96E+05 | 7.20E+04 | 0        |
| FP         | 24.07.17 | 20.758    | 3.883            | 2.83E+07                             | 5.16E+07 | 3.29E+07 | 7.71E+06 | 2.30E+05 | 0        |
| FP         | 25.07.17 | 20.784    | 2.055            | 2.58E+07                             | 4.07E+07 | 2.47E+07 | 6.18E+06 | 5.00E+04 | 0        |
| FP         | 26.07.17 | 20.989    | 2.550            | 4.22E+06                             | 1.59E+07 | 1.87E+07 | 5.13E+06 | 3.50E+05 | 0        |
| FP         | 27.07.17 | 21.563    | 2.092            | 2.46E+07                             | 3.40E+07 | 2.47E+07 | 3.59E+06 | 1.20E+05 | 0        |
| FP         | 28.07.17 | 22.325    | 2.318            | 1.59E+07                             | 3.19E+07 | 1.75E+07 | 2.43E+06 | 8.00E+04 | 0        |
| FP         | 29.07.17 | 21.971    | 4.438            | 2.80E+06                             | 2.08E+07 | 1.48E+06 | 4.25E+05 | 1.50E+05 | 0        |
| FP         | 30.07.17 | 19.823    | 4.874            | 1.98E+07                             | 7.50E+06 | 4.85E+06 | 9.70E+05 | 0        | 0        |
| Sig        | 02.08.17 | 15.997    | 2.055            | 2.70E+06                             | 1.32E+06 | 9.72E+05 | 5.13E+05 | 8.10E+04 | 0        |
| Sig        | 03.08.17 | 16.832    | 2.182            | 2.55E+06                             | 1.83E+06 | 9.93E+05 | 2.95E+05 | 5.40E+04 | 0        |
| Sig        | 04.08.17 | 18.734    | 3.251            | 1.12E+07                             | 6.50E+06 | 2.69E+06 | 4.80E+05 | 3.00E+04 | 0        |
| Sig        | 09.08.17 | 22.064    | 3.045            | 4.64E+07                             | 8.29E+07 | 4.79E+07 | 1.08E+07 | 5.80E+05 | 0        |
| Sig        | 10.08.17 | 22.041    | 2.694            | 2.00E+07                             | 3.34E+07 | 1.82E+07 | 4.23E+06 | 1.30E+05 | 0        |
| Sig        | 11.08.17 | 20.230    | 4.490            | 9.72E+06                             | 1.05E+07 | 5.75E+06 | 1.93E+06 | 3.30E+05 | 4.00E+04 |
| Sig        | 12.08.17 | 18.666    | 4.551            | 8.52E+06                             | 8.49E+06 | 3.71E+06 | 1.13E+06 | 1.33E+05 | 0        |
| Sig        | 14.08.17 | 19.269    | 5.154            | 1.82E+07                             | 1.77E+07 | 1.01E+07 | 2.65E+06 | 3.50E+05 | 0        |
| Sig        | 15.08.17 | 19.918    | 1.855            | 2.07E+06                             | 1.56E+06 | 9.83E+05 | 2.18E+05 | 5.50E+04 | 0        |
| Sig        | 16.08.17 | 22.284    | 1.523            | 1.83E+07                             | 2.45E+07 | 1.33E+07 | 2.77E+06 | 2.30E+05 | 0        |
| Sig        | 17.08.17 | 21.384    | 2.978            | 2.10E+07                             | 1.85E+07 | 8.83E+06 | 2.45E+06 | 3.60E+05 | 0        |
| Sig        | 18.08.17 | 20.574    | 3.080            | 9.04E+06                             | 5.60E+06 | 2.85E+06 | 7.56E+05 | 1.03E+05 | 0        |
| Sig        | 19.08.17 | 22.836    | 2.388            | 6.42E+06                             | 5.32E+06 | 3.42E+06 | 9.50E+05 | 1.52E+05 | 0        |
| Sig        | 20.08.17 | 23.049    | 2.321            | 3.69E+07                             | 6.64E+07 | 4.57E+07 | 1.98E+07 | 2.63E+06 | 6.00E+04 |
| Sig        | 21.08.17 | 22.127    | 1.991            | 5.52E+07                             | 1.04E+08 | 7.10E+07 | 2.22E+07 | 2.50E+06 | 1.00E+05 |

|     |          |        |       |          |          |          |          |          |   |
|-----|----------|--------|-------|----------|----------|----------|----------|----------|---|
| Sig | 22.08.17 | 21.126 | 3.011 | 4.74E+07 | 8.96E+07 | 5.80E+07 | 1.73E+07 | 1.45E+06 | 0 |
| Sig | 20.07.17 | 15.915 | 4.620 | 2.11E+06 | 1.15E+06 | 7.38E+05 | 7.12E+05 | 1.27E+05 | 0 |
| Sig | 21.07.17 | 14.153 | 3.830 | 2.12E+06 | 1.25E+06 | 4.24E+05 | 2.74E+05 | 0        | 0 |
| Sig | 26.07.17 | 20.989 | 2.550 | 3.05E+07 | 5.15E+07 | 3.06E+07 | 6.54E+06 | 3.10E+05 | 0 |
| Sig | 27.07.17 | 21.563 | 2.092 | 2.95E+07 | 5.97E+07 | 3.74E+07 | 5.75E+06 | 4.30E+05 | 0 |
| Sig | 28.07.17 | 22.325 | 2.318 | 3.58E+07 | 6.28E+07 | 3.54E+07 | 5.81E+06 | 2.00E+05 | 0 |
| Sig | 29.07.17 | 21.971 | 4.438 | 3.20E+07 | 5.78E+07 | 3.10E+07 | 4.68E+06 | 1.00E+05 | 0 |
| Sig | 30.07.17 | 19.823 | 4.874 | 1.04E+08 | 4.09E+07 | 9.80E+06 | 2.10E+06 | 3.00E+05 | 0 |

**Table S 3: Minimum, Maximum and Median Horizontal Mass Flux (mg/m<sup>2</sup>d) measured by Horizontal deposition samplers. Mass Flux in each size interval is also shown**

MW=MWAC, BS=BSNE

| Samp. Id. | Date     | Temp. (°C) | Wind Speed (m/s) | Mass Flux (mg/(m <sup>2</sup> d))    |         |         |          |          |          |
|-----------|----------|------------|------------------|--------------------------------------|---------|---------|----------|----------|----------|
|           |          |            |                  | Size interval (aerodynamic diameter) |         |         |          |          |          |
|           |          |            |                  | 1-2µm                                | 2-4µm   | 4-8µm   | 8-16µm   | 16-32µm  | 32-64µm  |
| MW        | 02.08.17 | 15.997     | 2.055            | 0.053                                | 0.3195  | 3.5756  | 18.9069  | 12.3191  | 0        |
| MW        | 04.08.17 | 18.734     | 3.251            | 0.0308                               | 0.1555  | 0.7479  | 0.9514   | 2.5171   | 0        |
| MW        | 08.08.17 | 22.889     | 4.303            | 0.573                                | 4.788   | 63.067  | 431.618  | 596.928  | 18.604   |
| MW        | 09.08.17 | 22.064     | 3.045            | 0.3805                               | 3.7223  | 53.2968 | 357.1174 | 276.0571 | 12.5649  |
| MW        | 10.08.17 | 22.041     | 2.694            | 0.2763                               | 3.1587  | 29.7283 | 207.9945 | 321.5826 | 53.2269  |
| MW        | 12.08.17 | 18.666     | 4.551            | 1.1247                               | 6.0944  | 49.9189 | 246.8832 | 180.6267 | 0        |
| MW        | 14.08.17 | 19.269     | 5.154            | 3.1606                               | 10.8308 | 87.7027 | 518.3101 | 513.3998 | 110.1782 |
| MW        | 15.08.17 | 19.918     | 1.855            | 0.1272                               | 0.742   | 5.9049  | 33.331   | 84.2202  | 0        |
| MW        | 17.08.17 | 21.384     | 2.978            | 0.0619                               | 0.5264  | 4.8274  | 36.7475  | 36.8723  | 26.7913  |
| MW        | 18.08.17 | 20.574     | 3.080            | 0.1162                               | 0.6434  | 4.26    | 21.1639  | 29.4541  | 47.5157  |
| MW        | 19.08.17 | 22.836     | 2.388            | 0.059                                | 0.4633  | 4.7649  | 21.8155  | 29.468   | 6.373    |
| MW        | 21.08.17 | 22.127     | 1.991            | 0.2617                               | 3.1625  | 17.5533 | 33.4467  | 24.5892  | 6.2844   |
| MW        | 22.08.17 | 21.126     | 3.011            | 0.2238                               | 2.7402  | 39.8506 | 288.9442 | 225.7404 | 24.2119  |
| MW        | 20.07.17 | 15.915     | 4.620            | 0.1951                               | 1.2363  | 12.9435 | 50.1497  | 120.0182 | 51.0725  |
| MW        | 21.07.17 | 14.153     | 3.830            | 0.0234                               | 0.1781  | 1.9931  | 7.0882   | 8.4802   | 2.4772   |
| MW        | 22.07.17 | 15.603     | 2.559            | 0.0059                               | 0.0165  | 0.0728  | 0.2085   | 0.3042   | 0        |
| MW        | 23.07.17 | 17.732     | 4.427            | 0.0219                               | 0.1316  | 1.4648  | 7.4614   | 6.4594   | 12.1317  |
| MW        | 26.07.17 | 20.989     | 2.550            | 0.1499                               | 1.7981  | 9.1141  | 11.8906  | 1.866    | 0        |
| MW        | 27.07.17 | 21.563     | 2.092            | 0.1436                               | 2.5401  | 16.6638 | 30.1571  | 9.0439   | 0        |
| MW        | 28.07.17 | 22.325     | 2.318            | 0.1674                               | 2.6065  | 12.0603 | 35.6525  | 24.0122  | 0        |

|    |          |        |       |        |        |         |          |          |          |
|----|----------|--------|-------|--------|--------|---------|----------|----------|----------|
| MW | 29.07.17 | 21.971 | 4.438 | 0.2055 | 2.4908 | 42.7172 | 163.4428 | 109.8901 | 0        |
| MW | 30.07.17 | 19.823 | 4.874 | 0.0576 | 0.4659 | 2.2444  | 5.989    | 7.0296   | 0        |
| BS | 03.08.17 | 16.832 | 2.182 | 0.0137 | 0.077  | 0.3143  | 0.7407   | 3.8354   | 0        |
| BS | 04.08.17 | 18.734 | 3.251 | 0.0193 | 0.1162 | 0.5597  | 1.6363   | 1.2249   | 0        |
| BS | 05.08.17 | 21.383 | 5.379 | 0.0506 | 0.6417 | 3.5234  | 8.293    | 9.3819   | 3.3068   |
| BS | 06.08.17 | 22.347 | 6.790 | 0.3858 | 5.0476 | 45.0073 | 159.0974 | 75.0699  | 26.4677  |
| BS | 07.08.17 | 22.706 | 4.842 | 0.6379 | 9.1193 | 51.2209 | 130.3214 | 80.8477  | 0        |
| BS | 08.08.17 | 22.889 | 4.303 | 0.7554 | 6.9688 | 36.7909 | 125.2447 | 88.1866  | 0        |
| BS | 09.08.17 | 22.064 | 3.045 | 0.3203 | 3.0439 | 13.5882 | 33.253   | 16.5779  | 21.672   |
| BS | 10.08.17 | 22.041 | 2.694 | 0.194  | 2.0181 | 8.6547  | 17.7228  | 10.3509  | 0        |
| BS | 12.08.17 | 18.666 | 4.551 | 0.037  | 0.3435 | 2.2437  | 8.2023   | 6.6773   | 4.2183   |
| BS | 14.08.17 | 19.269 | 5.154 | 0.1175 | 0.9683 | 7.6959  | 32.4113  | 37.7385  | 3.5343   |
| BS | 16.08.17 | 22.284 | 1.523 | 0.0036 | 0.0253 | 0.1168  | 0        | 0        | 0        |
| BS | 18.08.17 | 20.574 | 3.080 | 0.0403 | 0.2139 | 1.0044  | 3.4598   | 2.1027   | 0        |
| BS | 20.08.17 | 23.049 | 2.321 | 0.2178 | 2.2909 | 13.381  | 48.7953  | 48.1988  | 0        |
| BS | 21.08.17 | 23.049 | 1.991 | 0.3135 | 4.0807 | 21.3125 | 59.5899  | 52.2078  | 121.0427 |
| BS | 24.07.17 | 20.758 | 3.883 | 0.2912 | 3.0925 | 14.4286 | 33.4588  | 28.8779  | 0        |
| BS | 25.07.17 | 20.784 | 2.055 | 0.3448 | 2.9782 | 23.8669 | 15.4882  | 2.9016   | 0        |
| BS | 26.07.17 | 20.989 | 2.550 | 0.1655 | 1.8011 | 7.0431  | 15.266   | 3.2846   | 0        |
| BS | 27.07.17 | 21.563 | 2.092 | 0.2367 | 2.3747 | 9.1715  | 14.3749  | 2.402    | 0        |
| BS | 28.07.17 | 22.325 | 2.318 | 0.2228 | 2.2278 | 8.9356  | 9.8436   | 1.0245   | 0        |
| BS | 29.07.17 | 21.971 | 4.438 | 0.1944 | 2.3734 | 11.0921 | 20.7425  | 10.5312  | 4.1926   |
| BS | 30.07.17 | 19.823 | 4.874 | 0.0469 | 0.5442 | 2.8858  | 9.4036   | 5.3719   | 0        |

**Table S 4:** Minimum, Maximum and Median Horizontal Number Flux ( $1/(m^2d)$ ) measured by **Horizontal deposition samplers**. Number Flux in each size interval is also shown

MW=MWAC, BS=BSNE

| Samp. Id. | Date     | Temp. (°C) | Wind Speed (m/s) | Number Flux $1/(m^2d)$               |             |             |              |               |               |
|-----------|----------|------------|------------------|--------------------------------------|-------------|-------------|--------------|---------------|---------------|
|           |          |            |                  | Size interval (aerodynamic diameter) |             |             |              |               |               |
|           |          |            |                  | 1-2 $\mu$ m                          | 2-4 $\mu$ m | 4-8 $\mu$ m | 8-16 $\mu$ m | 16-32 $\mu$ m | 32-64 $\mu$ m |
| MW        | 02.08.17 | 15.997     | 2.055            | 1.10E+07                             | 9.09E+06    | 1.02E+07    | 7.47E+06     | 7.70E+05      | 0             |
| MW        | 04.08.17 | 18.734     | 3.251            | 7.12E+06                             | 4.26E+06    | 2.35E+06    | 4.20E+05     | 8.40E+04      | 0             |
| MW        | 08.08.17 | 22.889     | 4.303            | 1.06E+08                             | 1.29E+08    | 1.71E+08    | 1.86E+08     | 3.41E+07      | 2.00E+05      |
| MW        | 09.08.17 | 22.064     | 3.045            | 7.20E+07                             | 9.20E+07    | 1.40E+08    | 1.49E+08     | 1.66E+07      | 1.00E+05      |
| MW        | 10.08.17 | 22.041     | 2.694            | 4.75E+07                             | 8.06E+07    | 8.56E+07    | 8.75E+07     | 2.04E+07      | 4.80E+05      |
| MW        | 12.08.17 | 18.666     | 4.551            | 2.21E+08                             | 1.76E+08    | 1.47E+08    | 1.07E+08     | 1.42E+07      | 0             |
| MW        | 14.08.17 | 19.269     | 5.154            | 6.09E+08                             | 3.49E+08    | 2.46E+08    | 2.21E+08     | 3.26E+07      | 1.20E+06      |

|    |          |        |       |          |          |          |          |          |          |
|----|----------|--------|-------|----------|----------|----------|----------|----------|----------|
| MW | 15.08.17 | 19.918 | 1.855 | 2.57E+07 | 2.04E+07 | 1.67E+07 | 1.33E+07 | 4.02E+06 | 0        |
| MW | 17.08.17 | 21.384 | 2.978 | 1.10E+07 | 1.33E+07 | 1.41E+07 | 1.58E+07 | 2.08E+06 | 9.00E+04 |
| MW | 18.08.17 | 20.574 | 3.080 | 2.22E+07 | 1.83E+07 | 1.27E+07 | 9.05E+06 | 1.76E+06 | 2.30E+05 |
| MW | 19.08.17 | 22.836 | 2.388 | 1.08E+07 | 1.12E+07 | 1.36E+07 | 1.00E+07 | 1.82E+06 | 8.00E+04 |
| MW | 21.08.17 | 22.127 | 1.991 | 4.54E+07 | 7.94E+07 | 6.27E+07 | 1.72E+07 | 1.32E+06 | 7.00E+04 |
| MW | 22.08.17 | 21.126 | 3.011 | 4.07E+07 | 6.93E+07 | 1.07E+08 | 1.24E+08 | 1.49E+07 | 1.00E+05 |
| MW | 20.07.17 | 15.915 | 4.620 | 3.67E+07 | 3.23E+07 | 3.71E+07 | 2.25E+07 | 5.07E+06 | 2.90E+05 |
| MW | 21.07.17 | 14.153 | 3.830 | 2.73E+07 | 2.67E+07 | 3.21E+07 | 1.68E+07 | 2.74E+06 | 1.50E+05 |
| MW | 22.07.17 | 15.603 | 2.559 | 1.33E+06 | 4.42E+05 | 1.63E+05 | 9.30E+04 | 2.30E+04 | 0        |
| MW | 23.07.17 | 17.732 | 4.427 | 4.31E+06 | 3.82E+06 | 3.87E+06 | 3.55E+06 | 4.33E+05 | 2.70E+04 |
| MW | 26.07.17 | 20.989 | 2.550 | 2.66E+07 | 4.53E+07 | 3.34E+07 | 6.39E+06 | 1.80E+05 | 0        |
| MW | 27.07.17 | 21.563 | 2.092 | 2.50E+07 | 6.16E+07 | 5.73E+07 | 1.62E+07 | 5.60E+05 | 0        |
| MW | 28.07.17 | 22.325 | 2.318 | 2.81E+07 | 6.41E+07 | 4.25E+07 | 1.51E+07 | 1.82E+06 | 0        |
| MW | 29.07.17 | 21.971 | 4.438 | 3.80E+07 | 5.98E+07 | 1.13E+08 | 8.17E+07 | 7.80E+06 | 0        |
| MW | 30.07.17 | 19.823 | 4.874 | 1.20E+07 | 1.23E+07 | 8.23E+06 | 2.59E+06 | 3.50E+05 | 0        |
| BS | 03.08.17 | 16.832 | 2.182 | 2.67E+06 | 2.17E+06 | 1.09E+06 | 3.29E+05 | 9.90E+04 | 0        |
| BS | 04.08.17 | 18.734 | 3.251 | 4.43E+06 | 3.20E+06 | 1.92E+06 | 6.94E+05 | 9.90E+04 | 0        |
| BS | 05.08.17 | 21.383 | 5.379 | 9.16E+06 | 1.64E+07 | 1.20E+07 | 4.15E+06 | 4.90E+05 | 4.00E+04 |
| BS | 06.08.17 | 22.347 | 6.790 | 6.61E+06 | 1.27E+07 | 1.39E+07 | 7.15E+06 | 6.30E+05 | 3.00E+04 |
| BS | 07.08.17 | 22.706 | 4.842 | 1.06E+08 | 2.32E+08 | 1.72E+08 | 5.82E+07 | 6.40E+06 | 0        |
| BS | 08.08.17 | 22.889 | 4.303 | 1.44E+08 | 1.79E+08 | 1.29E+08 | 5.15E+07 | 7.70E+06 | 0        |
| BS | 09.08.17 | 22.064 | 3.045 | 5.65E+07 | 7.88E+07 | 5.07E+07 | 1.62E+07 | 1.01E+06 | 2.00E+05 |
| BS | 10.08.17 | 22.041 | 2.694 | 3.35E+07 | 5.33E+07 | 3.11E+07 | 9.35E+06 | 8.30E+05 | 0        |
| BS | 12.08.17 | 18.666 | 4.551 | 7.11E+06 | 8.52E+06 | 6.52E+06 | 3.50E+06 | 5.08E+05 | 2.80E+04 |
| BS | 14.08.17 | 19.269 | 5.154 | 2.45E+07 | 2.59E+07 | 2.36E+07 | 1.39E+07 | 2.10E+06 | 4.00E+04 |
| BS | 16.08.17 | 22.284 | 1.523 | 6.98E+05 | 7.62E+05 | 4.44E+05 | 0        | 0        | 0        |
| BS | 18.08.17 | 20.574 | 3.080 | 8.63E+06 | 6.30E+06 | 3.38E+06 | 1.63E+06 | 2.08E+05 | 0        |
| BS | 20.08.17 | 23.049 | 2.321 | 3.65E+07 | 6.08E+07 | 4.45E+07 | 2.19E+07 | 3.23E+06 | 0        |
| BS | 21.08.17 | 23.049 | 1.991 | 5.14E+07 | 1.01E+08 | 7.45E+07 | 2.65E+07 | 3.30E+06 | 2.00E+05 |
| BS | 24.07.17 | 20.758 | 3.883 | 5.28E+07 | 7.98E+07 | 4.97E+07 | 1.60E+07 | 1.96E+06 | 0        |
| BS | 25.07.17 | 20.784 | 2.055 | 6.03E+07 | 7.79E+07 | 3.61E+07 | 8.75E+06 | 2.40E+05 | 0        |
| BS | 26.07.17 | 20.989 | 2.550 | 2.95E+07 | 4.74E+07 | 2.66E+07 | 7.58E+06 | 2.90E+05 | 0        |
| BS | 27.07.17 | 21.563 | 2.092 | 4.11E+07 | 6.26E+07 | 3.46E+07 | 7.21E+06 | 2.00E+05 | 0        |
| BS | 28.07.17 | 22.325 | 2.318 | 3.95E+07 | 5.91E+07 | 3.33E+07 | 5.38E+06 | 1.00E+05 | 0        |
| BS | 29.07.17 | 21.971 | 4.438 | 3.27E+07 | 6.05E+07 | 3.87E+07 | 1.03E+07 | 7.50E+05 | 5.00E+04 |
| BS | 30.07.17 | 19.823 | 4.874 | 8.72E+06 | 1.35E+07 | 1.00E+07 | 4.23E+06 | 4.70E+05 | 0        |

**Table S 5:** Minimum, Maximum and Median Upward and Downward Mass Flux (**mg/m<sup>2</sup>d**) measured by Flat plate sampler (25mm) specified in size intervals ( $\mu\text{m}$ ). Mass Flux in each size interval is also shown.

FP\_U=Upward flux, FP\_D=Downward flux

| Samp. Id. | Date     | Temp. (°C) | Wind speed (m/s) | Mass flux (mg/(m <sup>2</sup> d))    |                   |                   |                    |                     |                     |
|-----------|----------|------------|------------------|--------------------------------------|-------------------|-------------------|--------------------|---------------------|---------------------|
|           |          |            |                  | Size interval (aerodynamic diameter) |                   |                   |                    |                     |                     |
|           |          |            |                  | 1-2 $\mu\text{m}$                    | 2-4 $\mu\text{m}$ | 4-8 $\mu\text{m}$ | 8-16 $\mu\text{m}$ | 16-32 $\mu\text{m}$ | 32-64 $\mu\text{m}$ |
| FP_U      | 20.07.17 | 15.915     | 4.620            | 0.006                                | 0.0126            | 0.0071            | 0.1607             | 0                   | 0                   |
| FP_U      | 21.07.17 | 14.153     | 3.830            | 0.0085                               | 0.0128            | 0.1135            | 0.2452             | 0                   | 0                   |
| FP_U      | 24.07.17 | 20.758     | 3.883            | 0.0129                               | 0.0456            | 0.2431            | 0.5339             | 0                   | 0                   |
| FP_U      | 25.07.17 | 20.784     | 2.055            | 0.0251                               | 0.0397            | 0.2362            | 0                  | 0                   | 0                   |
| FP_U      | 26.07.17 | 20.989     | 2.550            | 0.0104                               | 0.0803            | 0.1911            | 0.0924             | 0                   | 0                   |
| FP_U      | 27.07.17 | 21.563     | 2.092            | 0.0065                               | 0.0223            | 0.0759            | 0.2792             | 0.6606              | 0                   |
| FP_U      | 28.07.17 | 22.325     | 2.318            | 0.0225                               | 0.0375            | 0.1186            | 0.0279             | 0                   | 0                   |
| FP_U      | 29.07.17 | 21.971     | 4.438            | 0.021                                | 0.0444            | 0.1147            | 0.2817             | 0.2653              | 0                   |
|           |          |            |                  |                                      |                   |                   |                    |                     |                     |
| FP_D      | 20.07.17 | 15.915     | 4.620            | 0.0153                               | 0.0578            | 0.2786            | 0.8438             | 0.2835              | 0                   |
| FP_D      | 21.07.17 | 14.153     | 3.830            | 0.0357                               | 0.1865            | 1.0712            | 3.7204             | 2.787               | 0                   |
| FP_D      | 24.07.17 | 20.758     | 3.883            | 0.227                                | 2.7686            | 7.7674            | 5.2542             | 7.7463              | 0                   |
| FP_D      | 25.07.17 | 20.784     | 2.055            | 0.2505                               | 2.414             | 8.6004            | 9.5165             | 4.7043              | 0                   |
| FP_D      | 26.07.17 | 20.989     | 2.550            | 0.1151                               | 1.4906            | 5.555             | 6.5666             | 3.226               | 0                   |
| FP_D      | 27.07.17 | 21.563     | 2.092            | 0.1608                               | 2.1048            | 8.2862            | 10.0201            | 2.0881              | 0                   |
| FP_D      | 28.07.17 | 22.325     | 2.318            | 0.1585                               | 1.8237            | 7.0338            | 7.517              | 1.2685              | 0                   |
| FP_D      | 29.07.17 | 21.971     | 4.438            | 0.154                                | 2.0606            | 9.0657            | 8.783              | 2.9589              | 0                   |

**Table S 6:** Minimum, Maximum and Median Upward and Downward Number Flux (#/m<sup>2</sup>d) measured by Flat plate sampler (25mm) specified in size intervals (µm). Number flux in each size interval is also shown

FP\_U=Upward flux, FP\_D=Downward flux.

| Samp. Id. | Date     | Temp (°C) | Wind speed (m/s) | Number flux, 1/(m <sup>2</sup> d)    |          |          |          |          |         |
|-----------|----------|-----------|------------------|--------------------------------------|----------|----------|----------|----------|---------|
|           |          |           |                  | Size interval (aerodynamic diameter) |          |          |          |          |         |
|           |          |           |                  | 1-2µm                                | 2-4µm    | 4-8µm    | 8-16µm   | 16-32µm  | 32-64µm |
| FP_U      | 20.07.17 | 15.915    | 4.620            | 1.70E+06                             | 4.60E+05 | 3.50E+04 | 7.10E+04 | 0        | 0       |
| FP_U      | 21.07.17 | 14.153    | 3.830            | 1.86E+06                             | 5.32E+05 | 3.63E+05 | 1.21E+05 | 0        | 0       |
| FP_U      | 24.07.17 | 20.758    | 3.883            | 2.68E+06                             | 1.28E+06 | 8.35E+05 | 3.44E+05 | 0        | 0       |
| FP_U      | 25.07.17 | 20.784    | 2.055            | 4.99E+06                             | 1.28E+06 | 9.14E+05 | 0        | 0        | 0       |
| FP_U      | 26.07.17 | 20.989    | 2.550            | 2.33E+06                             | 2.15E+06 | 7.46E+05 | 6.80E+04 | 0        | 0       |
| FP_U      | 27.07.17 | 21.563    | 2.092            | 1.40E+06                             | 6.74E+05 | 2.89E+05 | 9.60E+04 | 2.40E+04 | 0       |
| FP_U      | 28.07.17 | 22.325    | 2.318            | 4.84E+06                             | 1.20E+06 | 5.19E+05 | 2.70E+04 | 0        | 0       |
| FP_U      | 29.07.17 | 21.971    | 4.438            | 4.84E+06                             | 1.20E+06 | 5.19E+05 | 2.70E+04 | 0        | 0       |
|           |          |           |                  |                                      |          |          |          |          |         |
| FP_D      | 20.07.17 | 15.915    | 4.620            | 3.81E+06                             | 1.82E+06 | 9.61E+05 | 3.64E+05 | 3.30E+04 | 0       |
| FP_D      | 21.07.17 | 14.153    | 3.830            | 7.68E+06                             | 6.33E+06 | 3.75E+06 | 1.84E+06 | 1.94E+05 | 0       |
| FP_D      | 24.07.17 | 20.758    | 3.883            | 3.90E+07                             | 7.12E+07 | 3.37E+07 | 3.25E+06 | 6.20E+05 | 0       |
| FP_D      | 25.07.17 | 20.784    | 2.055            | 4.43E+07                             | 6.54E+07 | 3.30E+07 | 5.41E+06 | 2.70E+05 | 0       |
| FP_D      | 26.07.17 | 20.989    | 2.550            | 2.03E+07                             | 3.77E+07 | 2.11E+07 | 3.41E+06 | 2.80E+05 | 0       |
| FP_D      | 27.07.17 | 21.563    | 2.092            | 2.61E+07                             | 5.22E+07 | 3.10E+07 | 5.26E+06 | 2.10E+05 | 0       |
| FP_D      | 28.07.17 | 22.325    | 2.318            | 2.75E+07                             | 4.70E+07 | 2.61E+07 | 4.41E+06 | 1.30E+05 | 0       |
| FP_D      | 29.07.17 | 21.971    | 4.438            | 2.59E+07                             | 5.27E+07 | 3.50E+07 | 4.81E+06 | 2.40E+05 | 0       |



**Table S 7:** Summary of regression analysis for correlation between calculated dust concentration and OPC measurement

| Sampler    | Calculated concentration vs OPC measured concentration |          |        |
|------------|--------------------------------------------------------|----------|--------|
|            | $r^2$                                                  | p-value  | slope  |
| Flat plate | 0.449                                                  | 0.0241   | 0.4084 |
| MWAC       | 0.243                                                  | 0.214    | 0.1654 |
| BSNE       | 0.968                                                  | 4.70E-08 | 0.8046 |
| Sigma-2    | 0.794                                                  | 0.00127  | 0.6851 |

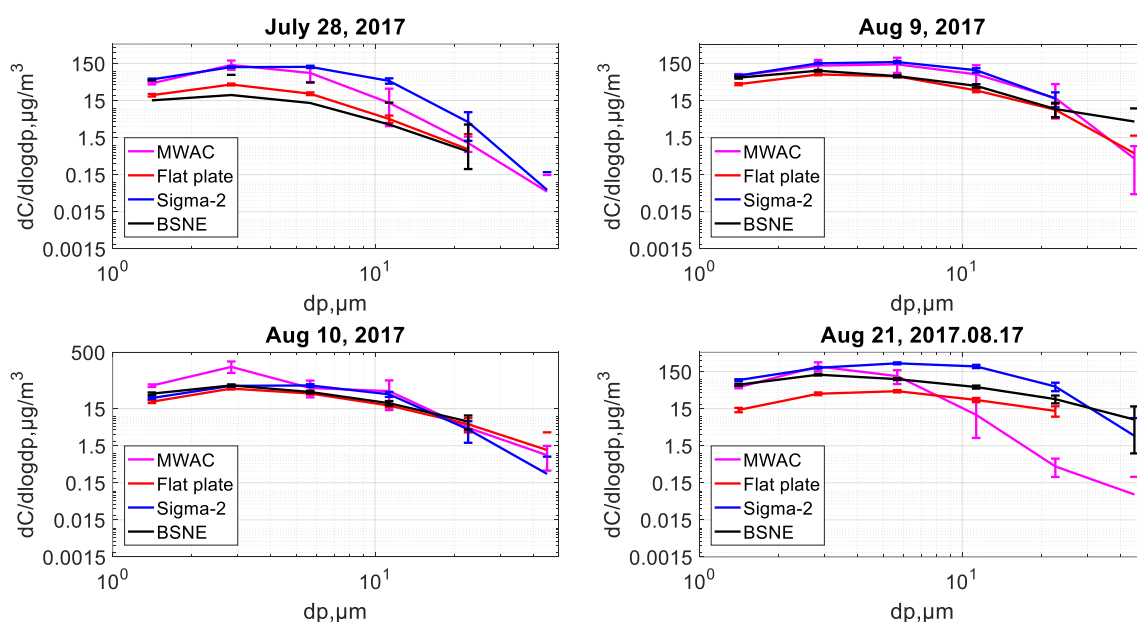

**Figure S 1:** Comparison of size resolved mass concentration measured by different samplers using different deposition velocity models. MWAC: Impaction curve & Piskunov deposition velocity model; Flat plate: Piskunov deposition velocity model; BSNE: Piskunov deposition velocity model; Sigma-2: Stokes' velocity.

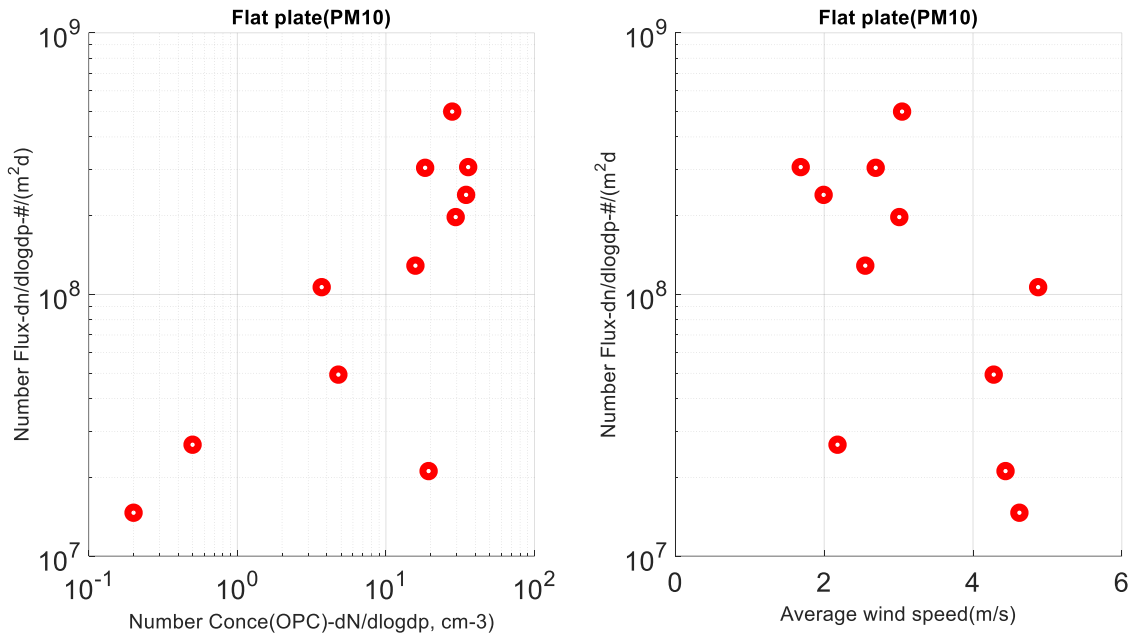

**Figure S 2:** Correlation between flux, dust concentration, and meteorological factor (wind speed).

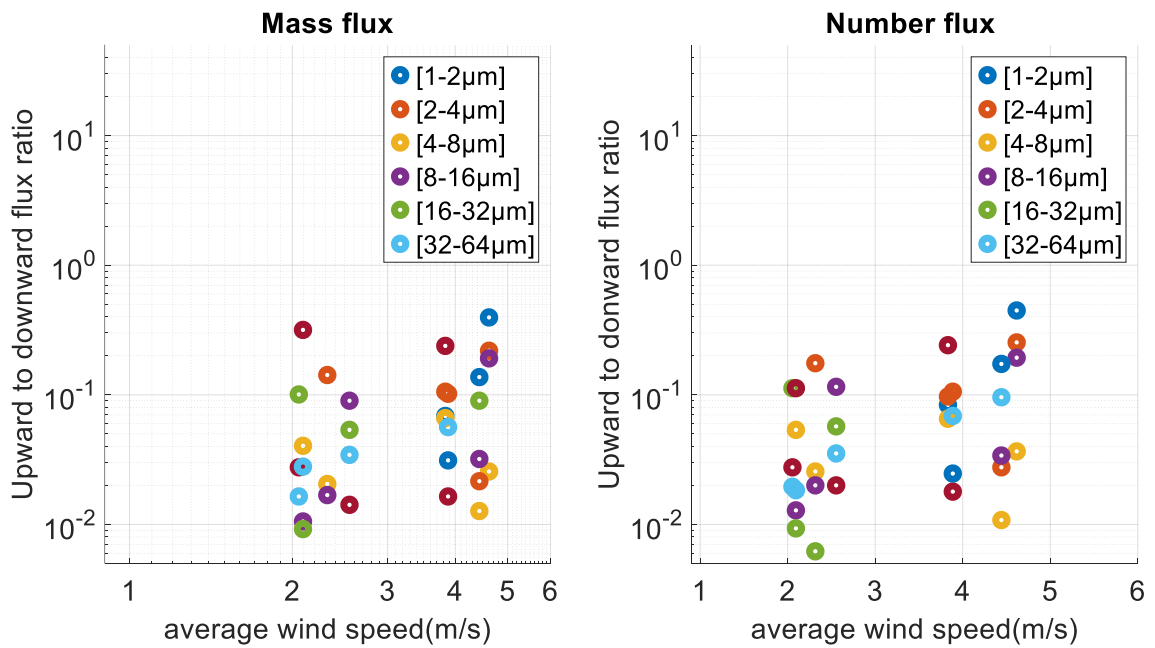

**Figure S 3:** Upward to downward flux ratio (number) vs wind speed. The flux is measured using flat plate sampler (with 25mm stub).

## 2 Computational fluid dynamics (CFD) simulation

### 2.1 Detail of the sampler construction for CFD geometries

#### 2.1.1 Flat plate sampler

The bottom part of the sampler is a cylinder with a diameter of 28.9 mm and a height of 29 mm followed by another cylinder with a diameter of 40 mm and a height of 14 mm. The first plate has a diameter of 127 mm and a thickness of 1 mm. In the middle of the area, the deposition area is defined as a circular surface with a diameter of 12 mm or 25 mm respectively. The upper plate has the same thickness but a diameter of 203.2 mm. Three columns hold the upper plate. The center of these columns is arranged on a diameter of 116 mm. The diameter of the columns is 5 mm with a height of 16 mm.

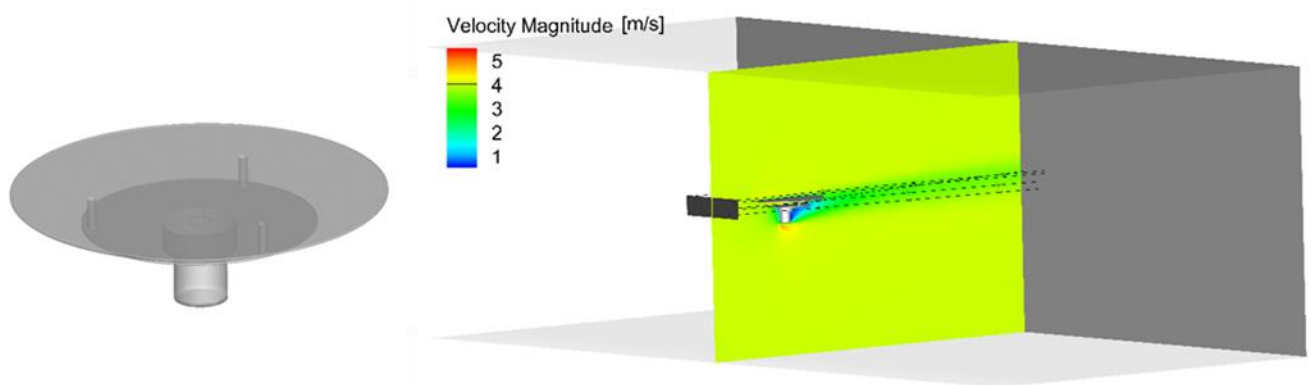

**Figure S 4:** Geometry of Flat plate sampler (left), CFD modeling domain and velocity magnitude, inlet velocity: 4m/s (right); in addition, the injection area is shown in black (width 0.2 m, height 0.05 m) along with exemplary particle trajectories.

#### 2.1.2 Sigma-2 sampler

At the bottom, it consists of a mounting pole with an inner diameter of 36 mm and an outer diameter of 50 mm with a height of 32 mm. Then follows the bottom of the sampler with a diameter of 108 mm and a height of 14 mm. The wall of the geometry has an inner diameter of 104 mm and is 260 mm high. From a height of 214 mm the cover of the sampler starts. It has an inner diameter of 154 mm and an outer diameter of 158 mm. In it, there are four openings, which start at a height of 226 mm and have a width of 40 mm and a height of 75 mm. The same openings exist in the inner radius as well however turned by 90 degrees. The collector inside the geometry has a diameter of 12 mm, a height of 13 mm and is positioned centrally at the bottom.

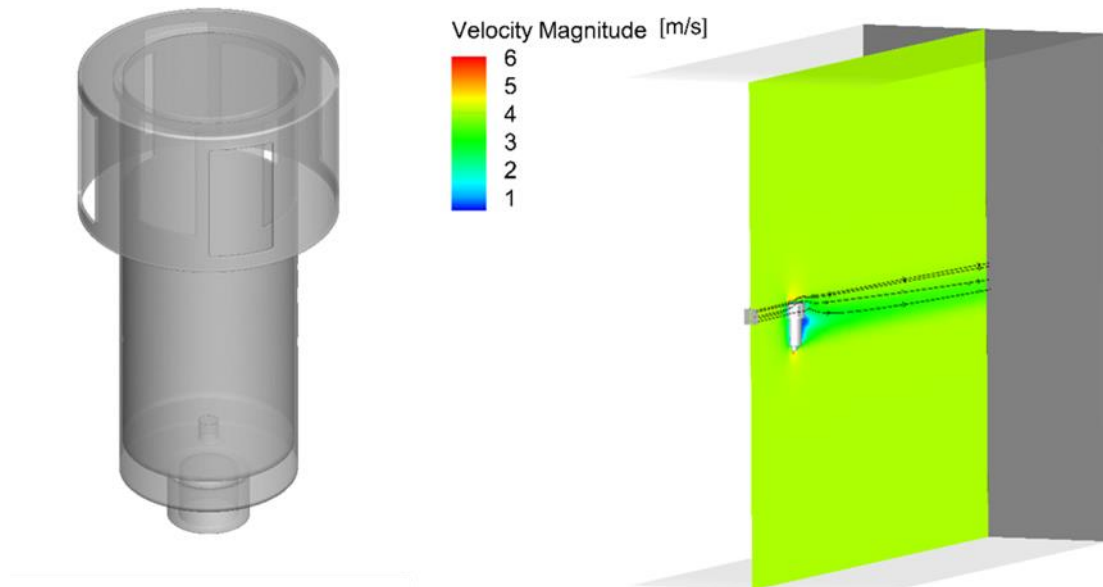

**Figure S 5:** Geometry of Sigma-2 sampler (left), CFD modeling domain and velocity magnitude; inlet velocity: 4m/s (right); in addition, the injection area is shown in black (width 0.2 m, height 0.1 m) along with exemplary particle trajectories.

### 2.1.3 MWAC sampler

The bottom diameter of the sampler is 48 mm with a thickness of 1.25 mm. Afterwards the inner diameter is 45.4 mm up to a height of 60 mm. The diameter then narrows semi circularly to 24 mm. The lid of the sampler has a diameter of 40 mm and a height of 17 mm.

The pipes have an inner diameter of 7.5 mm and a thickness of 1.25 mm. The pipe looking into the direction of the velocity inlet is longer and ends 23 mm above the bottom of the sampler. The outgoing pipe starts 38 mm above the bottom. The collector inside the geometry has a diameter of 12 mm, a height of 13 mm and is positioned centrally at the bottom.

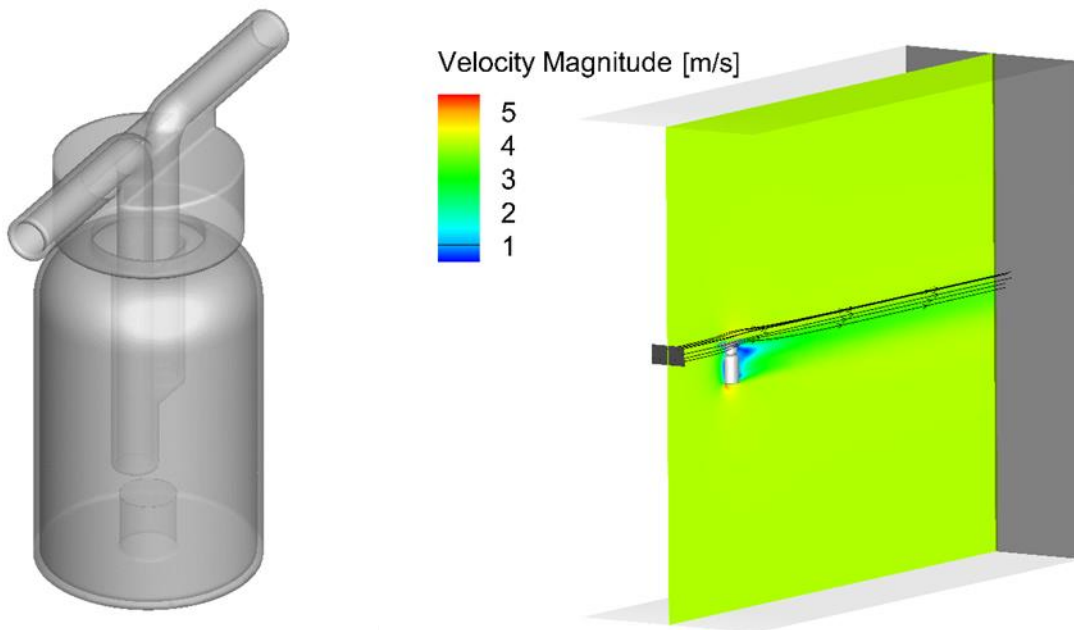

**Figure S 6:** Geometry of MWAC sampler (left), CFD modeling domain and velocity magnitude of MWAC sampler, inlet velocity: 4m/s (right); in addition, the injection area is shown in black (width 0.1 m, height 0.05 m) along with exemplary particle trajectories.

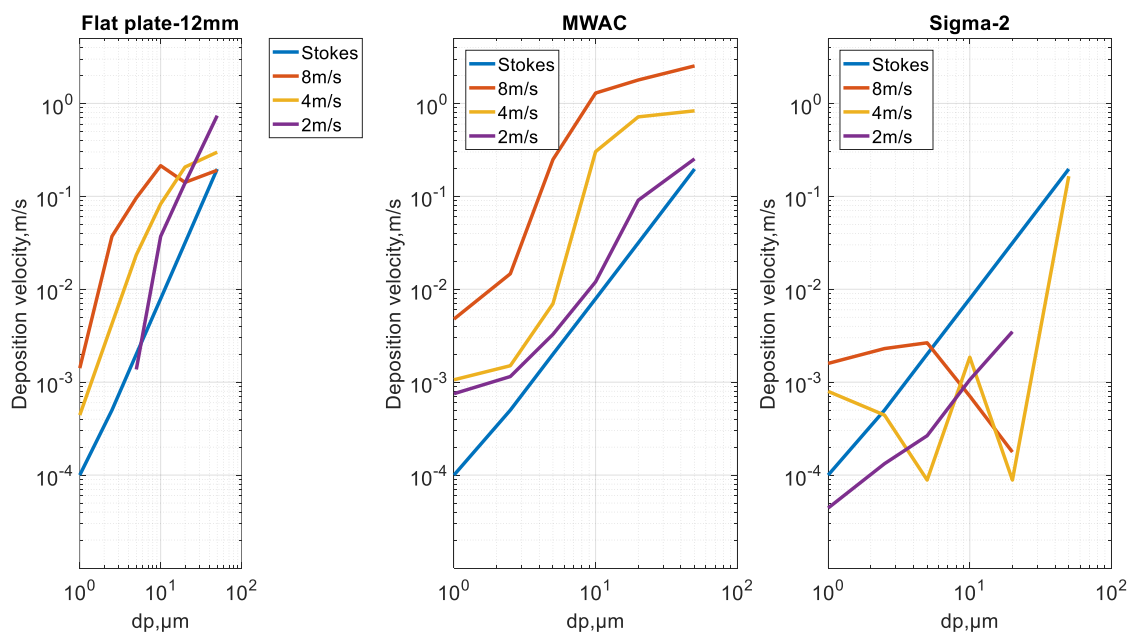

**Figure S 7:** Comparing the CFD-derived particle deposition velocities at different wind speed values for different samplers.
