# Supplementary material for: Field comparison of dry deposition samplers for collection of atmospheric mineral dust: results from single-particle characterization
Source: Copernicus journal article supplement (doi:10.5194/amt-2019-187), 2019-05-14
Supplement: Supplementary file [file amt-2019-187-AC1-supplement.zip]

# “Field comparison of dry deposition samplers for collection of atmospheric mineral dust: results from single-particle characterization”

A. WAZA<sup>1,\*</sup>, K. SCHNEIDERS<sup>1</sup>, J. MAY<sup>2</sup>, S. RODRÍGUEZ<sup>3,4</sup>, B. EPPLER<sup>2</sup>, K. KANDLER<sup>1</sup>

<sup>1</sup>Atmospheric Aerosol, Institute for Applied Geosciences, Technische Universität Darmstadt, D-64287 Darmstadt, Germany

<sup>2</sup>Institute for Energy Systems & Technology, Technische Universität Darmstadt, D-64287 Darmstadt, Germany

<sup>3</sup>Izaña Atmospheric Research Centre, AEMET, Tenerife, Spain.

<sup>4</sup>Estación Experimental de Zonas Áridas, EEZA CSIC, Almería, Spain.

\*correspondence to [andebo.waza@geo.tu-darmstadt.de](mailto:andebo.waza@geo.tu-darmstadt.de)

## 1 Measurement

**Table S 1:** Minimum, maximum and median daily basis mass deposition rate (**mg/(m<sup>2</sup>d)**) measured by **Vertical deposition samplers**. Mass deposition rate in each size interval is also shown.

FP=Flat plate, Sig=Sigma-2

| Samp. Id. | Date     | Temp (°C) | Wind speed (m/s) | Mass deposition rate (mg/(m <sup>2</sup> d)) |        |         |         |          |          |
|-----------|----------|-----------|------------------|----------------------------------------------|--------|---------|---------|----------|----------|
|           |          |           |                  | Size interval (aerodynamic diameter)         |        |         |         |          |          |
|           |          |           |                  | 1-2 µm                                       | 2-4 µm | 4-8 µm  | 8-16 µm | 16-32 µm | 32-64 µm |
| FP        | 02.08.17 | 15.997    | 2.055            | 0.0125                                       | 0.0332 | 0.1591  | 0.6915  | 1.0487   | 0        |
| FP        | 03.08.17 | 16.832    | 2.182            | 0.0178                                       | 0.085  | 0.4457  | 3.1786  | 3.5723   | 12.2381  |
| FP        | 09.08.17 | 22.064    | 3.045            | 0.2318                                       | 2.5612 | 12.1382 | 22.3694 | 17.5472  | 0        |
| FP        | 10.08.17 | 22.041    | 2.694            | 0.1268                                       | 1.7105 | 7.6181  | 14.3374 | 10.8418  | 7.2271   |
| FP        | 20.08.17 | 23.049    | 2.321            | 0.0587                                       | 0.9965 | 7.7644  | 31.8469 | 39.2924  | 0        |
| FP        | 21.08.17 | 22.127    | 1.991            | 0.0625                                       | 1.2487 | 9.9323  | 29.9751 | 22.0631  | 0        |
| FP        | 22.08.17 | 21.126    | 3.011            | 0.0413                                       | 1.0977 | 8.4911  | 16.1487 | 9.563    | 0        |
| FP        | 16.07.17 | 21.407    | 1.687            | 0.1512                                       | 1.6673 | 5.8333  | 10.3739 | 6.789    | 0        |
| FP        | 18.07.17 | 19.863    | 3.289            | 0.0773                                       | 1.0835 | 4.3797  | 5.3431  | 4.4326   | 0        |
| FP        | 19.07.17 | 17.691    | 4.275            | 0.0191                                       | 0.2874 | 1.4257  | 2.5807  | 0.7248   | 0        |
| FP        | 20.07.17 | 15.915    | 4.620            | 0.0084                                       | 0.0437 | 0.3936  | 1.7336  | 2.0418   | 0        |
| FP        | 24.07.17 | 20.758    | 3.883            | 0.1656                                       | 2.1236 | 8.9983  | 13.6345 | 2.7224   | 0        |
| FP        | 25.07.17 | 20.784    | 2.055            | 0.1468                                       | 1.5641 | 6.7421  | 11.8483 | 0.7455   | 0        |
| FP        | 26.07.17 | 20.989    | 2.550            | 0.0819                                       | 1.0551 | 5.0441  | 7.0303  | 1.8159   | 0        |
| FP        | 27.07.17 | 21.563    | 2.092            | 0.1272                                       | 1.3325 | 6.6209  | 5.5919  | 0.8894   | 0        |

|     |          |        |       |        |        |         |         |         |         |
|-----|----------|--------|-------|--------|--------|---------|---------|---------|---------|
| FP  | 28.07.17 | 22.325 | 2.318 | 0.0912 | 1.2328 | 4.7233  | 4.0095  | 1.9389  | 0       |
| FP  | 29.07.17 | 21.971 | 4.438 | 0.0145 | 0.0798 | 0.5085  | 0.7329  | 1.9062  | 0       |
| FP  | 30.07.17 | 19.823 | 4.874 | 0.08   | 0.2918 | 1.2003  | 1.9713  | 0       | 0       |
| Sig | 02.08.17 | 15.997 | 2.055 | 0.0133 | 0.0435 | 0.3232  | 1.4541  | 1.1561  | 0       |
| Sig | 03.08.17 | 16.832 | 2.182 | 0.0117 | 0.0637 | 0.2629  | 0.7752  | 0.7638  | 0       |
| Sig | 04.08.17 | 18.734 | 3.251 | 0.0537 | 0.2111 | 0.6742  | 0.9907  | 0.2664  | 0       |
| Sig | 09.08.17 | 22.064 | 3.045 | 0.2747 | 3.2314 | 12.3996 | 21.4241 | 7.4674  | 0       |
| Sig | 10.08.17 | 22.041 | 2.694 | 0.1171 | 1.312  | 4.7166  | 7.9581  | 1.4412  | 0       |
| Sig | 11.08.17 | 20.230 | 4.490 | 0.0506 | 0.3731 | 1.4438  | 3.2957  | 3.822   | 5.9832  |
| Sig | 12.08.17 | 18.666 | 4.551 | 0.0435 | 0.3212 | 1.0996  | 2.4052  | 2.1606  | 0       |
| Sig | 14.08.17 | 19.269 | 5.154 | 0.0929 | 0.6751 | 2.6105  | 5.3232  | 6.6811  | 0       |
| Sig | 15.08.17 | 19.918 | 1.855 | 0.0113 | 0.0581 | 0.2661  | 0.384   | 1.164   | 0       |
| Sig | 16.08.17 | 22.284 | 1.523 | 0.1003 | 0.973  | 3.507   | 5.4434  | 4.8978  | 0       |
| Sig | 17.08.17 | 21.384 | 2.978 | 0.1022 | 0.6704 | 2.382   | 4.9459  | 4.6931  | 0       |
| Sig | 18.08.17 | 20.574 | 3.080 | 0.0423 | 0.2089 | 0.7355  | 1.606   | 1.455   | 0       |
| Sig | 19.08.17 | 22.836 | 2.388 | 0.0337 | 0.2013 | 0.9165  | 2.0097  | 2.0509  | 0       |
| Sig | 20.08.17 | 23.049 | 2.321 | 0.2254 | 2.5137 | 12.8442 | 44.6417 | 42.0205 | 11.7559 |
| Sig | 21.08.17 | 22.127 | 1.991 | 0.3337 | 4.1199 | 20.8917 | 48.5994 | 36.6512 | 6.6514  |
| Sig | 22.08.17 | 21.126 | 3.011 | 0.2849 | 3.5102 | 16.3368 | 35.5797 | 17.1256 | 0       |
| Sig | 20.07.17 | 15.915 | 4.620 | 0.0102 | 0.0431 | 0.2539  | 1.8245  | 2.4863  | 0       |
| Sig | 21.07.17 | 14.153 | 3.830 | 0.0093 | 0.0405 | 0.1077  | 0.5439  | 0       | 0       |
| Sig | 26.07.17 | 20.989 | 2.550 | 0.1704 | 2.0074 | 8.3447  | 11.0216 | 3.496   | 0       |
| Sig | 27.07.17 | 21.563 | 2.092 | 0.1692 | 2.3802 | 10.0826 | 9.6501  | 4.2398  | 0       |
| Sig | 28.07.17 | 22.325 | 2.318 | 0.2126 | 2.3481 | 9.5403  | 10.2896 | 1.9448  | 0       |
| Sig | 29.07.17 | 21.971 | 4.438 | 0.1927 | 2.1052 | 8.1321  | 8.5173  | 1.0481  | 0       |
| Sig | 30.07.17 | 19.823 | 4.874 | 0.4671 | 1.2559 | 2.7535  | 4.3127  | 6.5318  | 0       |

**Table S 2:** Minimum, maximum and median daily basis number deposition rate ( $1/(m^2d)$ ) measured by **Vertical deposition samplers**. Number deposition rate in each size interval is also shown.

FP=Flat plate, Sig=Sigma-2

| Samp<br>. Id. | Date     | Temp<br>(°C) | Wind<br>speed<br>(m/s) | Number deposition rate $1/(m^2d)$    |             |             |              |               |               |
|---------------|----------|--------------|------------------------|--------------------------------------|-------------|-------------|--------------|---------------|---------------|
|               |          |              |                        | Size interval (aerodynamic diameter) |             |             |              |               |               |
|               |          |              |                        | 1-2 $\mu m$                          | 2-4 $\mu m$ | 4-8 $\mu m$ | 8-16 $\mu m$ | 16-32 $\mu m$ | 32-64 $\mu m$ |
| FP            | 02.08.17 | 15.997       | 2.055                  | 2.64E+06                             | 9.95E+05    | 6.99E+05    | 2.69E+05     | 2.70E+05      | 0             |
| FP            | 03.08.17 | 16.832       | 2.182                  | 4.22E+06                             | 2.39E+06    | 1.43E+06    | 1.14E+06     | 1.99E+05      | 8.50E+04      |
| FP            | 09.08.17 | 22.064       | 3.045                  | 4.12E+07                             | 6.57E+07    | 4.39E+07    | 1.10E+07     | 8.10E+05      | 0             |
| FP            | 10.08.17 | 22.041       | 2.694                  | 2.17E+07                             | 4.28E+07    | 2.70E+07    | 6.87E+06     | 6.30E+05      | 4.00E+04      |
| FP            | 20.08.17 | 23.049       | 2.321                  | 9.70E+06                             | 2.33E+07    | 2.49E+07    | 1.20E+07     | 2.79E+06      | 0             |
| FP            | 21.08.17 | 22.127       | 1.991                  | 9.52E+06                             | 2.87E+07    | 3.42E+07    | 1.35E+07     | 1.66E+06      | 0             |
| FP            | 22.08.17 | 21.126       | 3.011                  | 6.48E+06                             | 2.43E+07    | 2.87E+07    | 7.87E+06     | 5.40E+05      | 0             |

|     |          |        |       |          |          |          |          |          |          |
|-----|----------|--------|-------|----------|----------|----------|----------|----------|----------|
| FP  | 16.07.17 | 21.407 | 1.687 | 2.72E+07 | 4.26E+07 | 2.25E+07 | 5.69E+06 | 4.40E+05 | 0        |
| FP  | 18.07.17 | 19.863 | 3.289 | 1.33E+07 | 2.74E+07 | 1.66E+07 | 3.02E+06 | 3.20E+05 | 0        |
| FP  | 19.07.17 | 17.691 | 4.275 | 3.34E+06 | 6.59E+06 | 4.97E+06 | 1.32E+06 | 8.40E+04 | 0        |
| FP  | 20.07.17 | 15.915 | 4.620 | 1.80E+06 | 1.34E+06 | 1.27E+06 | 6.96E+05 | 7.20E+04 | 0        |
| FP  | 24.07.17 | 20.758 | 3.883 | 2.83E+07 | 5.16E+07 | 3.29E+07 | 7.71E+06 | 2.30E+05 | 0        |
| FP  | 25.07.17 | 20.784 | 2.055 | 2.58E+07 | 4.07E+07 | 2.47E+07 | 6.18E+06 | 5.00E+04 | 0        |
| FP  | 26.07.17 | 20.989 | 2.550 | 4.22E+06 | 1.59E+07 | 1.87E+07 | 5.13E+06 | 3.50E+05 | 0        |
| FP  | 27.07.17 | 21.563 | 2.092 | 2.46E+07 | 3.40E+07 | 2.47E+07 | 3.59E+06 | 1.20E+05 | 0        |
| FP  | 28.07.17 | 22.325 | 2.318 | 1.59E+07 | 3.19E+07 | 1.75E+07 | 2.43E+06 | 8.00E+04 | 0        |
| FP  | 29.07.17 | 21.971 | 4.438 | 2.80E+06 | 2.08E+07 | 1.48E+06 | 4.25E+05 | 1.50E+05 | 0        |
| FP  | 30.07.17 | 19.823 | 4.874 | 1.98E+07 | 7.50E+06 | 4.85E+06 | 9.70E+05 | 0        | 0        |
| Sig | 02.08.17 | 15.997 | 2.055 | 2.70E+06 | 1.32E+06 | 9.72E+05 | 5.13E+05 | 8.10E+04 | 0        |
| Sig | 03.08.17 | 16.832 | 2.182 | 2.55E+06 | 1.83E+06 | 9.93E+05 | 2.95E+05 | 5.40E+04 | 0        |
| Sig | 04.08.17 | 18.734 | 3.251 | 1.12E+07 | 6.50E+06 | 2.69E+06 | 4.80E+05 | 3.00E+04 | 0        |
| Sig | 09.08.17 | 22.064 | 3.045 | 4.64E+07 | 8.29E+07 | 4.79E+07 | 1.08E+07 | 5.80E+05 | 0        |
| Sig | 10.08.17 | 22.041 | 2.694 | 2.00E+07 | 3.34E+07 | 1.82E+07 | 4.23E+06 | 1.30E+05 | 0        |
| Sig | 11.08.17 | 20.230 | 4.490 | 9.72E+06 | 1.05E+07 | 5.75E+06 | 1.93E+06 | 3.30E+05 | 4.00E+04 |
| Sig | 12.08.17 | 18.666 | 4.551 | 8.52E+06 | 8.49E+06 | 3.71E+06 | 1.13E+06 | 1.33E+05 | 0        |
| Sig | 14.08.17 | 19.269 | 5.154 | 1.82E+07 | 1.77E+07 | 1.01E+07 | 2.65E+06 | 3.50E+05 | 0        |
| Sig | 15.08.17 | 19.918 | 1.855 | 2.07E+06 | 1.56E+06 | 9.83E+05 | 2.18E+05 | 5.50E+04 | 0        |
| Sig | 16.08.17 | 22.284 | 1.523 | 1.83E+07 | 2.45E+07 | 1.33E+07 | 2.77E+06 | 2.30E+05 | 0        |
| Sig | 17.08.17 | 21.384 | 2.978 | 2.10E+07 | 1.85E+07 | 8.83E+06 | 2.45E+06 | 3.60E+05 | 0        |
| Sig | 18.08.17 | 20.574 | 3.080 | 9.04E+06 | 5.60E+06 | 2.85E+06 | 7.56E+05 | 1.03E+05 | 0        |
| Sig | 19.08.17 | 22.836 | 2.388 | 6.42E+06 | 5.32E+06 | 3.42E+06 | 9.50E+05 | 1.52E+05 | 0        |
| Sig | 20.08.17 | 23.049 | 2.321 | 3.69E+07 | 6.64E+07 | 4.57E+07 | 1.98E+07 | 2.63E+06 | 6.00E+04 |
| Sig | 21.08.17 | 22.127 | 1.991 | 5.52E+07 | 1.04E+08 | 7.10E+07 | 2.22E+07 | 2.50E+06 | 1.00E+05 |
| Sig | 22.08.17 | 21.126 | 3.011 | 4.74E+07 | 8.96E+07 | 5.80E+07 | 1.73E+07 | 1.45E+06 | 0        |
| Sig | 20.07.17 | 15.915 | 4.620 | 2.11E+06 | 1.15E+06 | 7.38E+05 | 7.12E+05 | 1.27E+05 | 0        |
| Sig | 21.07.17 | 14.153 | 3.830 | 2.12E+06 | 1.25E+06 | 4.24E+05 | 2.74E+05 | 0        | 0        |
| Sig | 26.07.17 | 20.989 | 2.550 | 3.05E+07 | 5.15E+07 | 3.06E+07 | 6.54E+06 | 3.10E+05 | 0        |
| Sig | 27.07.17 | 21.563 | 2.092 | 2.95E+07 | 5.97E+07 | 3.74E+07 | 5.75E+06 | 4.30E+05 | 0        |
| Sig | 28.07.17 | 22.325 | 2.318 | 3.58E+07 | 6.28E+07 | 3.54E+07 | 5.81E+06 | 2.00E+05 | 0        |
| Sig | 29.07.17 | 21.971 | 4.438 | 3.20E+07 | 5.78E+07 | 3.10E+07 | 4.68E+06 | 1.00E+05 | 0        |
| Sig | 30.07.17 | 19.823 | 4.874 | 1.04E+08 | 4.09E+07 | 9.80E+06 | 2.10E+06 | 3.00E+05 | 0        |

**Table S 3:** Minimum, maximum and median horizontal daily basis mass deposition rate (**mg/(m<sup>2</sup>d)**) measured by **Horizontal deposition samplers**. Mass deposition rate in each size interval is also shown

MW=MWAC, BS=BSNE

| Samp. Id. | Date     | Temp. (°C) | Wind Speed (m/s) | Mass deposition rate ( <b>mg/(m<sup>2</sup>d)</b> ) |         |         |          |          |          |
|-----------|----------|------------|------------------|-----------------------------------------------------|---------|---------|----------|----------|----------|
|           |          |            |                  | Size interval (aerodynamic diameter)                |         |         |          |          |          |
|           |          |            |                  | 1-2 µm                                              | 2-4 µm  | 4-8 µm  | 8-16 µm  | 16-32 µm | 32-64 µm |
| MW        | 02.08.17 | 15.997     | 2.055            | 0.053                                               | 0.3195  | 3.5756  | 18.9069  | 12.3191  | 0        |
| MW        | 04.08.17 | 18.734     | 3.251            | 0.0308                                              | 0.1555  | 0.7479  | 0.9514   | 2.5171   | 0        |
| MW        | 08.08.17 | 22.889     | 4.303            | 0.573                                               | 4.788   | 63.067  | 431.618  | 596.928  | 18.604   |
| MW        | 09.08.17 | 22.064     | 3.045            | 0.3805                                              | 3.7223  | 53.2968 | 357.1174 | 276.0571 | 12.5649  |
| MW        | 10.08.17 | 22.041     | 2.694            | 0.2763                                              | 3.1587  | 29.7283 | 207.9945 | 321.5826 | 53.2269  |
| MW        | 12.08.17 | 18.666     | 4.551            | 1.1247                                              | 6.0944  | 49.9189 | 246.8832 | 180.6267 | 0        |
| MW        | 14.08.17 | 19.269     | 5.154            | 3.1606                                              | 10.8308 | 87.7027 | 518.3101 | 513.3998 | 110.1782 |
| MW        | 15.08.17 | 19.918     | 1.855            | 0.1272                                              | 0.742   | 5.9049  | 33.331   | 84.2202  | 0        |
| MW        | 17.08.17 | 21.384     | 2.978            | 0.0619                                              | 0.5264  | 4.8274  | 36.7475  | 36.8723  | 26.7913  |
| MW        | 18.08.17 | 20.574     | 3.080            | 0.1162                                              | 0.6434  | 4.26    | 21.1639  | 29.4541  | 47.5157  |
| MW        | 19.08.17 | 22.836     | 2.388            | 0.059                                               | 0.4633  | 4.7649  | 21.8155  | 29.468   | 6.373    |
| MW        | 21.08.17 | 22.127     | 1.991            | 0.2617                                              | 3.1625  | 17.5533 | 33.4467  | 24.5892  | 6.2844   |
| MW        | 22.08.17 | 21.126     | 3.011            | 0.2238                                              | 2.7402  | 39.8506 | 288.9442 | 225.7404 | 24.2119  |
| MW        | 20.07.17 | 15.915     | 4.620            | 0.1951                                              | 1.2363  | 12.9435 | 50.1497  | 120.0182 | 51.0725  |
| MW        | 21.07.17 | 14.153     | 3.830            | 0.0234                                              | 0.1781  | 1.9931  | 7.0882   | 8.4802   | 2.4772   |
| MW        | 22.07.17 | 15.603     | 2.559            | 0.0059                                              | 0.0165  | 0.0728  | 0.2085   | 0.3042   | 0        |
| MW        | 23.07.17 | 17.732     | 4.427            | 0.0219                                              | 0.1316  | 1.4648  | 7.4614   | 6.4594   | 12.1317  |
| MW        | 26.07.17 | 20.989     | 2.550            | 0.1499                                              | 1.7981  | 9.1141  | 11.8906  | 1.866    | 0        |
| MW        | 27.07.17 | 21.563     | 2.092            | 0.1436                                              | 2.5401  | 16.6638 | 30.1571  | 9.0439   | 0        |
| MW        | 28.07.17 | 22.325     | 2.318            | 0.1674                                              | 2.6065  | 12.0603 | 35.6525  | 24.0122  | 0        |
| MW        | 29.07.17 | 21.971     | 4.438            | 0.2055                                              | 2.4908  | 42.7172 | 163.4428 | 109.8901 | 0        |
| MW        | 30.07.17 | 19.823     | 4.874            | 0.0576                                              | 0.4659  | 2.2444  | 5.989    | 7.0296   | 0        |
| BS        | 03.08.17 | 16.832     | 2.182            | 0.0137                                              | 0.077   | 0.3143  | 0.7407   | 3.8354   | 0        |
| BS        | 04.08.17 | 18.734     | 3.251            | 0.0193                                              | 0.1162  | 0.5597  | 1.6363   | 1.2249   | 0        |
| BS        | 05.08.17 | 21.383     | 5.379            | 0.0506                                              | 0.6417  | 3.5234  | 8.293    | 9.3819   | 3.3068   |
| BS        | 06.08.17 | 22.347     | 6.790            | 0.3858                                              | 5.0476  | 45.0073 | 159.0974 | 75.0699  | 26.4677  |
| BS        | 07.08.17 | 22.706     | 4.842            | 0.6379                                              | 9.1193  | 51.2209 | 130.3214 | 80.8477  | 0        |
| BS        | 08.08.17 | 22.889     | 4.303            | 0.7554                                              | 6.9688  | 36.7909 | 125.2447 | 88.1866  | 0        |
| BS        | 09.08.17 | 22.064     | 3.045            | 0.3203                                              | 3.0439  | 13.5882 | 33.253   | 16.5779  | 21.672   |
| BS        | 10.08.17 | 22.041     | 2.694            | 0.194                                               | 2.0181  | 8.6547  | 17.7228  | 10.3509  | 0        |
| BS        | 12.08.17 | 18.666     | 4.551            | 0.037                                               | 0.3435  | 2.2437  | 8.2023   | 6.6773   | 4.2183   |
| BS        | 14.08.17 | 19.269     | 5.154            | 0.1175                                              | 0.9683  | 7.6959  | 32.4113  | 37.7385  | 3.5343   |
| BS        | 16.08.17 | 22.284     | 1.523            | 0.0036                                              | 0.0253  | 0.1168  | 0        | 0        | 0        |
| BS        | 18.08.17 | 20.574     | 3.080            | 0.0403                                              | 0.2139  | 1.0044  | 3.4598   | 2.1027   | 0        |

|    |          |        |       |        |        |         |         |         |          |
|----|----------|--------|-------|--------|--------|---------|---------|---------|----------|
| BS | 20.08.17 | 23.049 | 2.321 | 0.2178 | 2.2909 | 13.381  | 48.7953 | 48.1988 | 0        |
| BS | 21.08.17 | 23.049 | 1.991 | 0.3135 | 4.0807 | 21.3125 | 59.5899 | 52.2078 | 121.0427 |
| BS | 24.07.17 | 20.758 | 3.883 | 0.2912 | 3.0925 | 14.4286 | 33.4588 | 28.8779 | 0        |
| BS | 25.07.17 | 20.784 | 2.055 | 0.3448 | 2.9782 | 23.8669 | 15.4882 | 2.9016  | 0        |
| BS | 26.07.17 | 20.989 | 2.550 | 0.1655 | 1.8011 | 7.0431  | 15.266  | 3.2846  | 0        |
| BS | 27.07.17 | 21.563 | 2.092 | 0.2367 | 2.3747 | 9.1715  | 14.3749 | 2.402   | 0        |
| BS | 28.07.17 | 22.325 | 2.318 | 0.2228 | 2.2278 | 8.9356  | 9.8436  | 1.0245  | 0        |
| BS | 29.07.17 | 21.971 | 4.438 | 0.1944 | 2.3734 | 11.0921 | 20.7425 | 10.5312 | 4.1926   |
| BS | 30.07.17 | 19.823 | 4.874 | 0.0469 | 0.5442 | 2.8858  | 9.4036  | 5.3719  | 0        |

**Table S 4:** Minimum, maximum and median horizontal daily basis number deposition rate ( $1/(m^2d)$ ) measured by **Horizontal deposition samplers**. Number deposition rate in each size interval is also shown

MW=MWAC, BS=BSNE

| Samp. Id. | Date     | Temp. (°C) | Wind Speed (m/s) | Number deposition rate $1/(m^2d)$    |             |             |              |               |               |
|-----------|----------|------------|------------------|--------------------------------------|-------------|-------------|--------------|---------------|---------------|
|           |          |            |                  | Size interval (aerodynamic diameter) |             |             |              |               |               |
|           |          |            |                  | 1-2 $\mu m$                          | 2-4 $\mu m$ | 4-8 $\mu m$ | 8-16 $\mu m$ | 16-32 $\mu m$ | 32-64 $\mu m$ |
| MW        | 02.08.17 | 15.997     | 2.055            | 1.10E+07                             | 9.09E+06    | 1.02E+07    | 7.47E+06     | 7.70E+05      | 0             |
| MW        | 04.08.17 | 18.734     | 3.251            | 7.12E+06                             | 4.26E+06    | 2.35E+06    | 4.20E+05     | 8.40E+04      | 0             |
| MW        | 08.08.17 | 22.889     | 4.303            | 1.06E+08                             | 1.29E+08    | 1.71E+08    | 1.86E+08     | 3.41E+07      | 2.00E+05      |
| MW        | 09.08.17 | 22.064     | 3.045            | 7.20E+07                             | 9.20E+07    | 1.40E+08    | 1.49E+08     | 1.66E+07      | 1.00E+05      |
| MW        | 10.08.17 | 22.041     | 2.694            | 4.75E+07                             | 8.06E+07    | 8.56E+07    | 8.75E+07     | 2.04E+07      | 4.80E+05      |
| MW        | 12.08.17 | 18.666     | 4.551            | 2.21E+08                             | 1.76E+08    | 1.47E+08    | 1.07E+08     | 1.42E+07      | 0             |
| MW        | 14.08.17 | 19.269     | 5.154            | 6.09E+08                             | 3.49E+08    | 2.46E+08    | 2.21E+08     | 3.26E+07      | 1.20E+06      |
| MW        | 15.08.17 | 19.918     | 1.855            | 2.57E+07                             | 2.04E+07    | 1.67E+07    | 1.33E+07     | 4.02E+06      | 0             |
| MW        | 17.08.17 | 21.384     | 2.978            | 1.10E+07                             | 1.33E+07    | 1.41E+07    | 1.58E+07     | 2.08E+06      | 9.00E+04      |
| MW        | 18.08.17 | 20.574     | 3.080            | 2.22E+07                             | 1.83E+07    | 1.27E+07    | 9.05E+06     | 1.76E+06      | 2.30E+05      |
| MW        | 19.08.17 | 22.836     | 2.388            | 1.08E+07                             | 1.12E+07    | 1.36E+07    | 1.00E+07     | 1.82E+06      | 8.00E+04      |
| MW        | 21.08.17 | 22.127     | 1.991            | 4.54E+07                             | 7.94E+07    | 6.27E+07    | 1.72E+07     | 1.32E+06      | 7.00E+04      |
| MW        | 22.08.17 | 21.126     | 3.011            | 4.07E+07                             | 6.93E+07    | 1.07E+08    | 1.24E+08     | 1.49E+07      | 1.00E+05      |
| MW        | 20.07.17 | 15.915     | 4.620            | 3.67E+07                             | 3.23E+07    | 3.71E+07    | 2.25E+07     | 5.07E+06      | 2.90E+05      |
| MW        | 21.07.17 | 14.153     | 3.830            | 2.73E+07                             | 2.67E+07    | 3.21E+07    | 1.68E+07     | 2.74E+06      | 1.50E+05      |
| MW        | 22.07.17 | 15.603     | 2.559            | 1.33E+06                             | 4.42E+05    | 1.63E+05    | 9.30E+04     | 2.30E+04      | 0             |
| MW        | 23.07.17 | 17.732     | 4.427            | 4.31E+06                             | 3.82E+06    | 3.87E+06    | 3.55E+06     | 4.33E+05      | 2.70E+04      |
| MW        | 26.07.17 | 20.989     | 2.550            | 2.66E+07                             | 4.53E+07    | 3.34E+07    | 6.39E+06     | 1.80E+05      | 0             |
| MW        | 27.07.17 | 21.563     | 2.092            | 2.50E+07                             | 6.16E+07    | 5.73E+07    | 1.62E+07     | 5.60E+05      | 0             |
| MW        | 28.07.17 | 22.325     | 2.318            | 2.81E+07                             | 6.41E+07    | 4.25E+07    | 1.51E+07     | 1.82E+06      | 0             |
| MW        | 29.07.17 | 21.971     | 4.438            | 3.80E+07                             | 5.98E+07    | 1.13E+08    | 8.17E+07     | 7.80E+06      | 0             |
| MW        | 30.07.17 | 19.823     | 4.874            | 1.20E+07                             | 1.23E+07    | 8.23E+06    | 2.59E+06     | 3.50E+05      | 0             |

|    |          |        |       |          |          |          |          |          |          |
|----|----------|--------|-------|----------|----------|----------|----------|----------|----------|
| BS | 03.08.17 | 16.832 | 2.182 | 2.67E+06 | 2.17E+06 | 1.09E+06 | 3.29E+05 | 9.90E+04 | 0        |
| BS | 04.08.17 | 18.734 | 3.251 | 4.43E+06 | 3.20E+06 | 1.92E+06 | 6.94E+05 | 9.90E+04 | 0        |
| BS | 05.08.17 | 21.383 | 5.379 | 9.16E+06 | 1.64E+07 | 1.20E+07 | 4.15E+06 | 4.90E+05 | 4.00E+04 |
| BS | 06.08.17 | 22.347 | 6.790 | 6.61E+06 | 1.27E+07 | 1.39E+07 | 7.15E+06 | 6.30E+05 | 3.00E+04 |
| BS | 07.08.17 | 22.706 | 4.842 | 1.06E+08 | 2.32E+08 | 1.72E+08 | 5.82E+07 | 6.40E+06 | 0        |
| BS | 08.08.17 | 22.889 | 4.303 | 1.44E+08 | 1.79E+08 | 1.29E+08 | 5.15E+07 | 7.70E+06 | 0        |
| BS | 09.08.17 | 22.064 | 3.045 | 5.65E+07 | 7.88E+07 | 5.07E+07 | 1.62E+07 | 1.01E+06 | 2.00E+05 |
| BS | 10.08.17 | 22.041 | 2.694 | 3.35E+07 | 5.33E+07 | 3.11E+07 | 9.35E+06 | 8.30E+05 | 0        |
| BS | 12.08.17 | 18.666 | 4.551 | 7.11E+06 | 8.52E+06 | 6.52E+06 | 3.50E+06 | 5.08E+05 | 2.80E+04 |
| BS | 14.08.17 | 19.269 | 5.154 | 2.45E+07 | 2.59E+07 | 2.36E+07 | 1.39E+07 | 2.10E+06 | 4.00E+04 |
| BS | 16.08.17 | 22.284 | 1.523 | 6.98E+05 | 7.62E+05 | 4.44E+05 | 0        | 0        | 0        |
| BS | 18.08.17 | 20.574 | 3.080 | 8.63E+06 | 6.30E+06 | 3.38E+06 | 1.63E+06 | 2.08E+05 | 0        |
| BS | 20.08.17 | 23.049 | 2.321 | 3.65E+07 | 6.08E+07 | 4.45E+07 | 2.19E+07 | 3.23E+06 | 0        |
| BS | 21.08.17 | 23.049 | 1.991 | 5.14E+07 | 1.01E+08 | 7.45E+07 | 2.65E+07 | 3.30E+06 | 2.00E+05 |
| BS | 24.07.17 | 20.758 | 3.883 | 5.28E+07 | 7.98E+07 | 4.97E+07 | 1.60E+07 | 1.96E+06 | 0        |
| BS | 25.07.17 | 20.784 | 2.055 | 6.03E+07 | 7.79E+07 | 3.61E+07 | 8.75E+06 | 2.40E+05 | 0        |
| BS | 26.07.17 | 20.989 | 2.550 | 2.95E+07 | 4.74E+07 | 2.66E+07 | 7.58E+06 | 2.90E+05 | 0        |
| BS | 27.07.17 | 21.563 | 2.092 | 4.11E+07 | 6.26E+07 | 3.46E+07 | 7.21E+06 | 2.00E+05 | 0        |
| BS | 28.07.17 | 22.325 | 2.318 | 3.95E+07 | 5.91E+07 | 3.33E+07 | 5.38E+06 | 1.00E+05 | 0        |
| BS | 29.07.17 | 21.971 | 4.438 | 3.27E+07 | 6.05E+07 | 3.87E+07 | 1.03E+07 | 7.50E+05 | 5.00E+04 |
| BS | 30.07.17 | 19.823 | 4.874 | 8.72E+06 | 1.35E+07 | 1.00E+07 | 4.23E+06 | 4.70E+05 | 0        |

**Table S 5:** Minimum, maximum and median upward and downward daily basis mass deposition rate (**mg/(m<sup>2</sup>d)**) measured by Flat plate sampler (25mm) specified in size intervals ( $\mu\text{m}$ ). Mass deposition rate in each size interval is also shown.

FP\_U=Upward deposition rate, FP\_D=Downward deposition rate

| Samp. Id. | Date     | Temp. (°C) | Wind speed (m/s) | Mass deposition rate ( <b>mg/(m<sup>2</sup>d)</b> ) |                   |                   |                    |                     |                     |
|-----------|----------|------------|------------------|-----------------------------------------------------|-------------------|-------------------|--------------------|---------------------|---------------------|
|           |          |            |                  | Size interval (aerodynamic diameter)                |                   |                   |                    |                     |                     |
|           |          |            |                  | 1-2 $\mu\text{m}$                                   | 2-4 $\mu\text{m}$ | 4-8 $\mu\text{m}$ | 8-16 $\mu\text{m}$ | 16-32 $\mu\text{m}$ | 32-64 $\mu\text{m}$ |
| FP_U      | 20.07.17 | 15.915     | 4.620            | 0.006                                               | 0.0126            | 0.0071            | 0.1607             | 0                   | 0                   |
| FP_U      | 21.07.17 | 14.153     | 3.830            | 0.0085                                              | 0.0128            | 0.1135            | 0.2452             | 0                   | 0                   |
| FP_U      | 24.07.17 | 20.758     | 3.883            | 0.0129                                              | 0.0456            | 0.2431            | 0.5339             | 0                   | 0                   |
| FP_U      | 25.07.17 | 20.784     | 2.055            | 0.0251                                              | 0.0397            | 0.2362            | 0                  | 0                   | 0                   |
| FP_U      | 26.07.17 | 20.989     | 2.550            | 0.0104                                              | 0.0803            | 0.1911            | 0.0924             | 0                   | 0                   |
| FP_U      | 27.07.17 | 21.563     | 2.092            | 0.0065                                              | 0.0223            | 0.0759            | 0.2792             | 0.6606              | 0                   |
| FP_U      | 28.07.17 | 22.325     | 2.318            | 0.0225                                              | 0.0375            | 0.1186            | 0.0279             | 0                   | 0                   |
| FP_U      | 29.07.17 | 21.971     | 4.438            | 0.021                                               | 0.0444            | 0.1147            | 0.2817             | 0.2653              | 0                   |
|           |          |            |                  |                                                     |                   |                   |                    |                     |                     |
| FP_D      | 20.07.17 | 15.915     | 4.620            | 0.0153                                              | 0.0578            | 0.2786            | 0.8438             | 0.2835              | 0                   |

|      |          |        |       |        |        |        |         |        |   |
|------|----------|--------|-------|--------|--------|--------|---------|--------|---|
| FP_D | 21.07.17 | 14.153 | 3.830 | 0.0357 | 0.1865 | 1.0712 | 3.7204  | 2.787  | 0 |
| FP_D | 24.07.17 | 20.758 | 3.883 | 0.227  | 2.7686 | 7.7674 | 5.2542  | 7.7463 | 0 |
| FP_D | 25.07.17 | 20.784 | 2.055 | 0.2505 | 2.414  | 8.6004 | 9.5165  | 4.7043 | 0 |
| FP_D | 26.07.17 | 20.989 | 2.550 | 0.1151 | 1.4906 | 5.555  | 6.5666  | 3.226  | 0 |
| FP_D | 27.07.17 | 21.563 | 2.092 | 0.1608 | 2.1048 | 8.2862 | 10.0201 | 2.0881 | 0 |
| FP_D | 28.07.17 | 22.325 | 2.318 | 0.1585 | 1.8237 | 7.0338 | 7.517   | 1.2685 | 0 |
| FP_D | 29.07.17 | 21.971 | 4.438 | 0.154  | 2.0606 | 9.0657 | 8.783   | 2.9589 | 0 |

**Table S 6:** Minimum, maximum and median upward and downward daily basis number deposition rate ( $1/(m^2d)$ ) measured by Flat plate sampler (25mm) specified in size intervals ( $\mu m$ ). Number deposition rate in each size interval is also shown

FP\_U=Upward deposition rate, FP\_D=Downward deposition rate.

| Samp. Id. | Date     | Temp ( $^{\circ}C$ ) | Wind speed (m/s) | Number deposition rate, $1/(m^2d)$   |             |             |              |               |               |
|-----------|----------|----------------------|------------------|--------------------------------------|-------------|-------------|--------------|---------------|---------------|
|           |          |                      |                  | Size interval (aerodynamic diameter) |             |             |              |               |               |
|           |          |                      |                  | 1-2 $\mu m$                          | 2-4 $\mu m$ | 4-8 $\mu m$ | 8-16 $\mu m$ | 16-32 $\mu m$ | 32-64 $\mu m$ |
| FP_U      | 20.07.17 | 15.915               | 4.620            | 1.70E+06                             | 4.60E+05    | 3.50E+04    | 7.10E+04     | 0             | 0             |
| FP_U      | 21.07.17 | 14.153               | 3.830            | 1.86E+06                             | 5.32E+05    | 3.63E+05    | 1.21E+05     | 0             | 0             |
| FP_U      | 24.07.17 | 20.758               | 3.883            | 2.68E+06                             | 1.28E+06    | 8.35E+05    | 3.44E+05     | 0             | 0             |
| FP_U      | 25.07.17 | 20.784               | 2.055            | 4.99E+06                             | 1.28E+06    | 9.14E+05    | 0            | 0             | 0             |
| FP_U      | 26.07.17 | 20.989               | 2.550            | 2.33E+06                             | 2.15E+06    | 7.46E+05    | 6.80E+04     | 0             | 0             |
| FP_U      | 27.07.17 | 21.563               | 2.092            | 1.40E+06                             | 6.74E+05    | 2.89E+05    | 9.60E+04     | 2.40E+04      | 0             |
| FP_U      | 28.07.17 | 22.325               | 2.318            | 4.84E+06                             | 1.20E+06    | 5.19E+05    | 2.70E+04     | 0             | 0             |
| FP_U      | 29.07.17 | 21.971               | 4.438            | 4.84E+06                             | 1.20E+06    | 5.19E+05    | 2.70E+04     | 0             | 0             |
|           |          |                      |                  |                                      |             |             |              |               |               |
| FP_D      | 20.07.17 | 15.915               | 4.620            | 3.81E+06                             | 1.82E+06    | 9.61E+05    | 3.64E+05     | 3.30E+04      | 0             |
| FP_D      | 21.07.17 | 14.153               | 3.830            | 7.68E+06                             | 6.33E+06    | 3.75E+06    | 1.84E+06     | 1.94E+05      | 0             |
| FP_D      | 24.07.17 | 20.758               | 3.883            | 3.90E+07                             | 7.12E+07    | 3.37E+07    | 3.25E+06     | 6.20E+05      | 0             |
| FP_D      | 25.07.17 | 20.784               | 2.055            | 4.43E+07                             | 6.54E+07    | 3.30E+07    | 5.41E+06     | 2.70E+05      | 0             |
| FP_D      | 26.07.17 | 20.989               | 2.550            | 2.03E+07                             | 3.77E+07    | 2.11E+07    | 3.41E+06     | 2.80E+05      | 0             |
| FP_D      | 27.07.17 | 21.563               | 2.092            | 2.61E+07                             | 5.22E+07    | 3.10E+07    | 5.26E+06     | 2.10E+05      | 0             |
| FP_D      | 28.07.17 | 22.325               | 2.318            | 2.75E+07                             | 4.70E+07    | 2.61E+07    | 4.41E+06     | 1.30E+05      | 0             |
| FP_D      | 29.07.17 | 21.971               | 4.438            | 2.59E+07                             | 5.27E+07    | 3.50E+07    | 4.81E+06     | 2.40E+05      | 0             |

**Table S 7:** Summary of regression analysis for correlation between calculated dust concentration and OPC measurement

| Sampler    | Calculated concentration vs OPC measured concentration |          |        |
|------------|--------------------------------------------------------|----------|--------|
|            | $r^2$                                                  | p-value  | slope  |
|            |                                                        |          |        |
| Flat plate | 0.449                                                  | 0.0241   | 0.4084 |
| MWAC       | 0.243                                                  | 0.214    | 0.1654 |
| BSNE       | 0.968                                                  | 4.70E-08 | 0.8046 |
| Sigma-2    | 0.794                                                  | 0.00127  | 0.6851 |

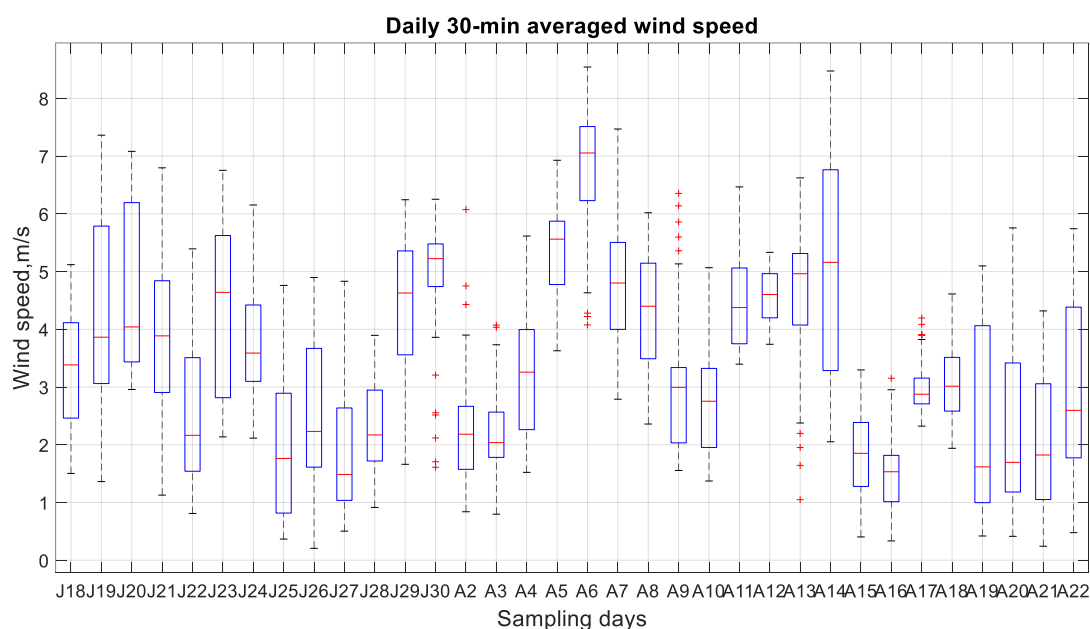

**Figure S 1:** Daily box-plots of 30-min averaged wind speed observed at Izaña Global Atmospheric watch Observatorio from 18/July/2017 to 23/August/2017 (e.g., each day was divided in 30-minute interval averages and then the mean and standard deviation was calculated from this data). On each blue box, the central mark is the median, the edges of the box are the 25th and 75th percentiles. The black vertical lines show the standard deviation (J=July, A=August).



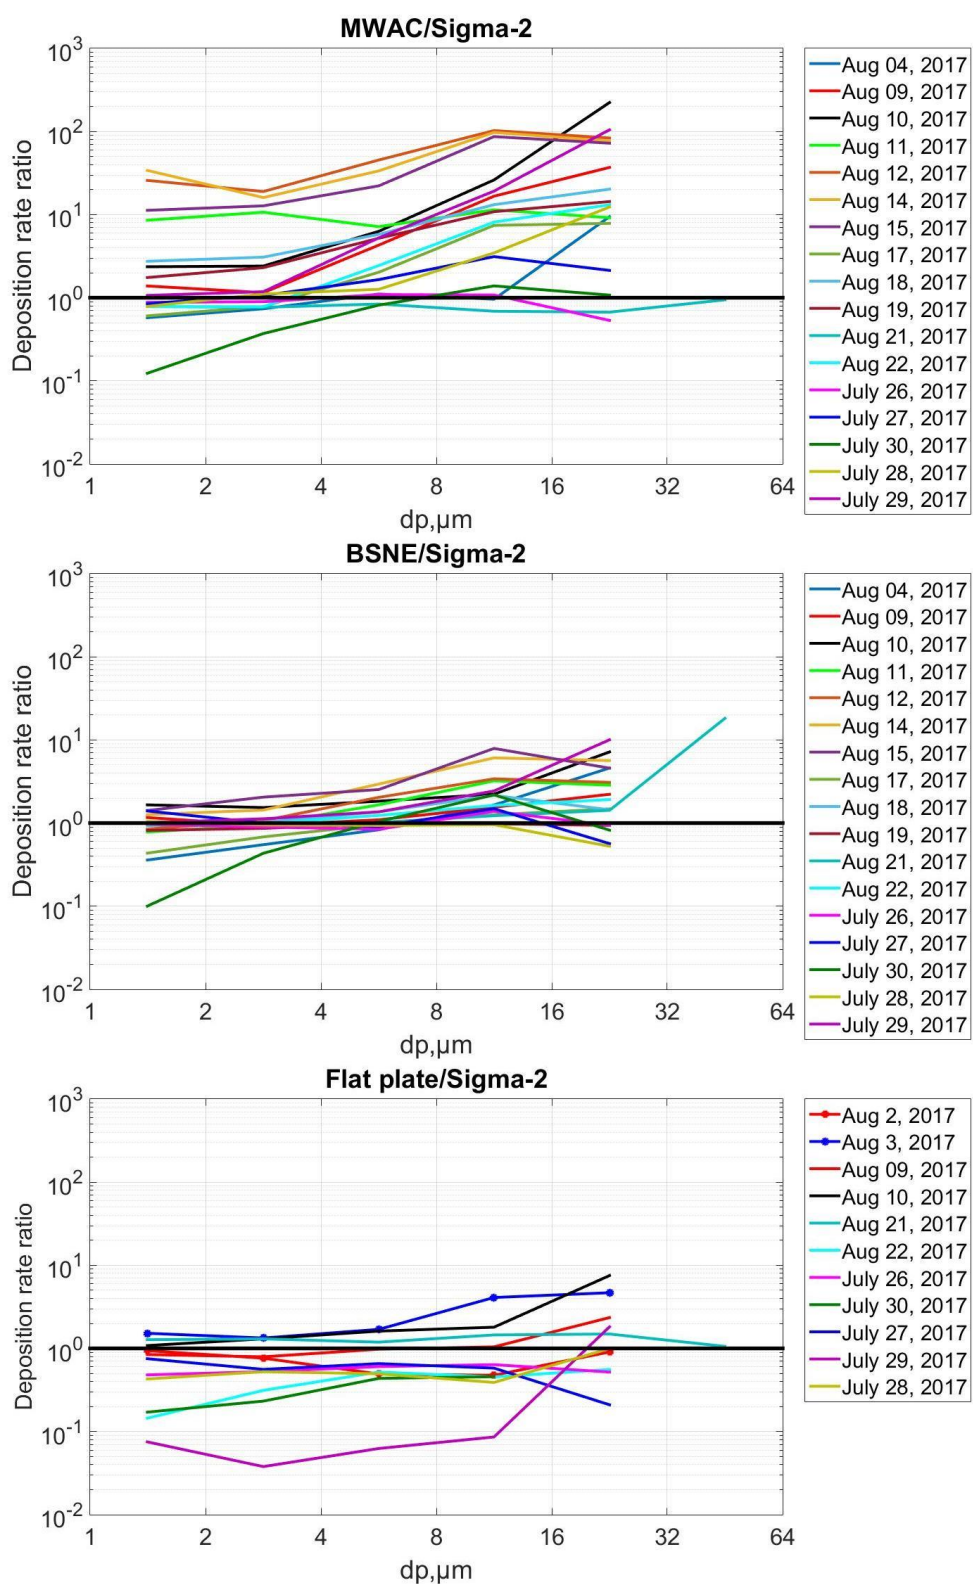

**Figure S 2:** Deposition rate ratio as function of particle size (MWAC/Sigma-2 (a), BSNE/Sigma-2 (b) and Flat plate/Sigma-2 (c)).

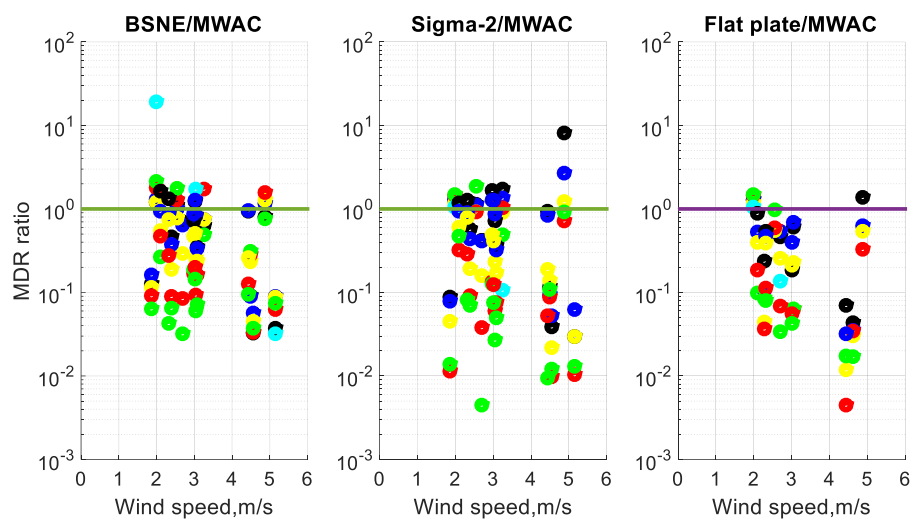

**Figure S 3:** Mass deposition rate (MDR) ratio as function of wind speed for different measurement days. Different colors represent deposition rates in different size intervals (black: 1-2  $\mu\text{m}$ ; blue: 2-4  $\mu\text{m}$ ; yellow: 4-8  $\mu\text{m}$ ; red: 8-16  $\mu\text{m}$ ; green: 16-32  $\mu\text{m}$ ; cyan: 32-64  $\mu\text{m}$ ).

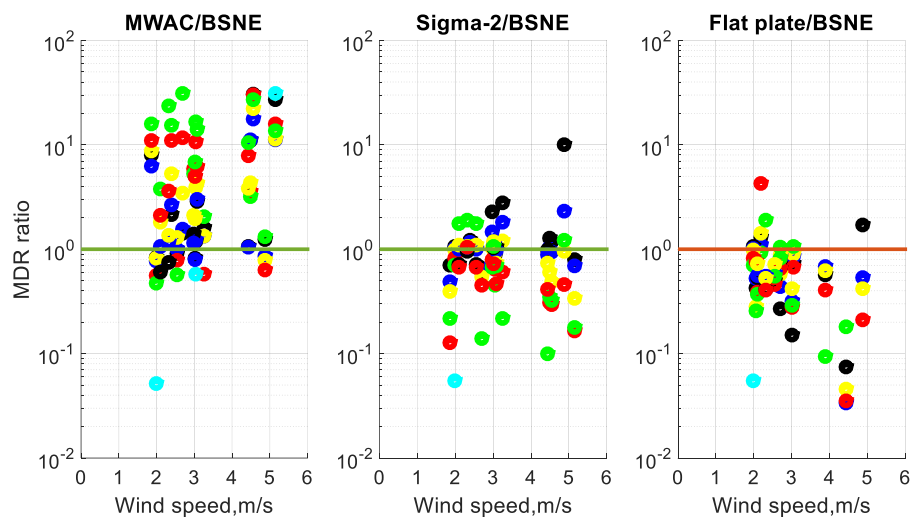

**Figure S 4:** Mass deposition rate (MDR) ratio as function of wind speed for different measurement days. Different colors represent deposition rates in different size intervals (black: 1-2  $\mu\text{m}$ ; blue: 2-4  $\mu\text{m}$ ; yellow: 4-8  $\mu\text{m}$ ; red: 8-16  $\mu\text{m}$ ; green: 16-32  $\mu\text{m}$ ; cyan: 32-64  $\mu\text{m}$ ).

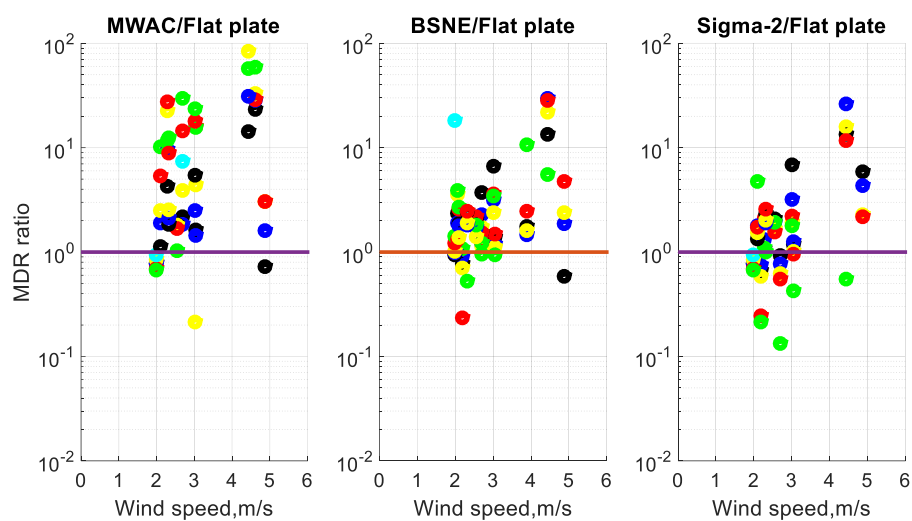

**Figure S 5:** Mass deposition rate (MDR) ratio as function of wind speed for different measurement days. Different colors represent deposition rates in different size intervals (black: 1-2  $\mu\text{m}$ ; blue: 2-4  $\mu\text{m}$ ; yellow: 4-8  $\mu\text{m}$ ; red: 8-16  $\mu\text{m}$ ; green: 16-32  $\mu\text{m}$ ; cyan: 32-64  $\mu\text{m}$ ).

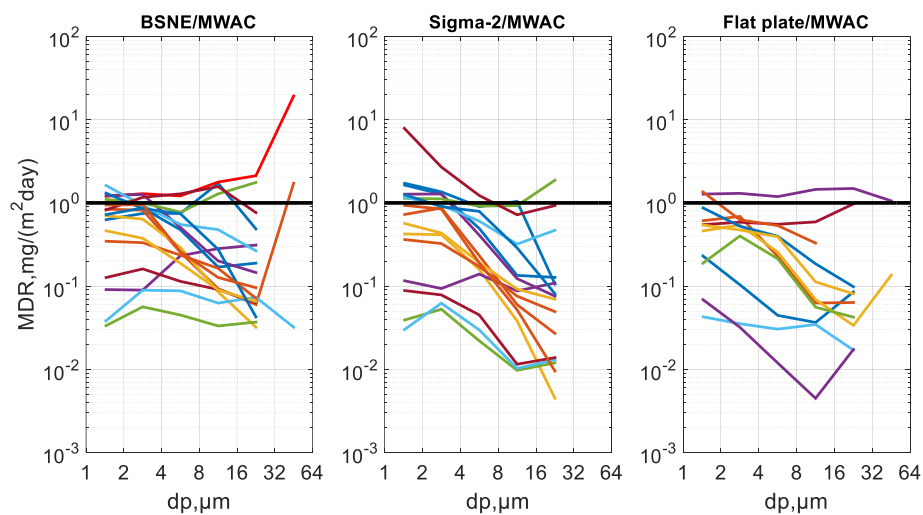

**Figure S 6:** Mass deposition rate (MDR) ratio as function of particle size (different colors show different for measurement days).

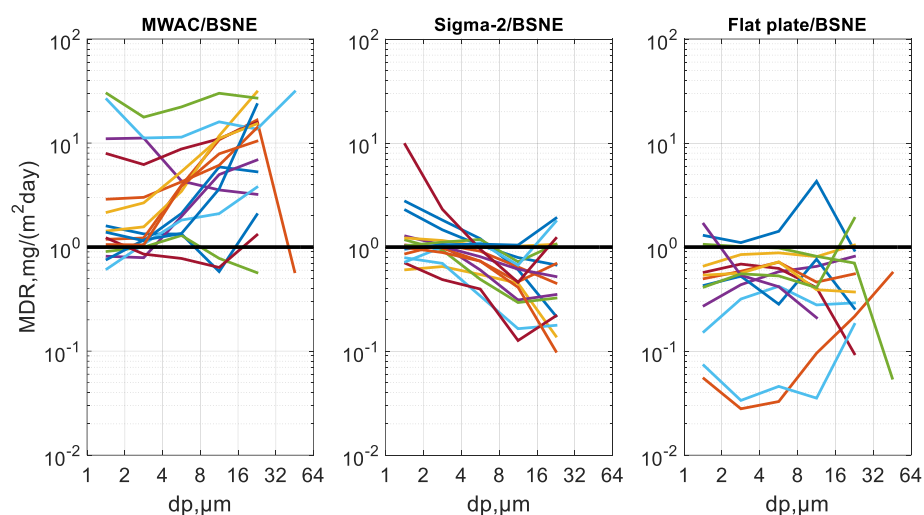

**Figure S 7:** Mass deposition rate (MDR) ratio as function of particle size (different colors show different for measurement days).

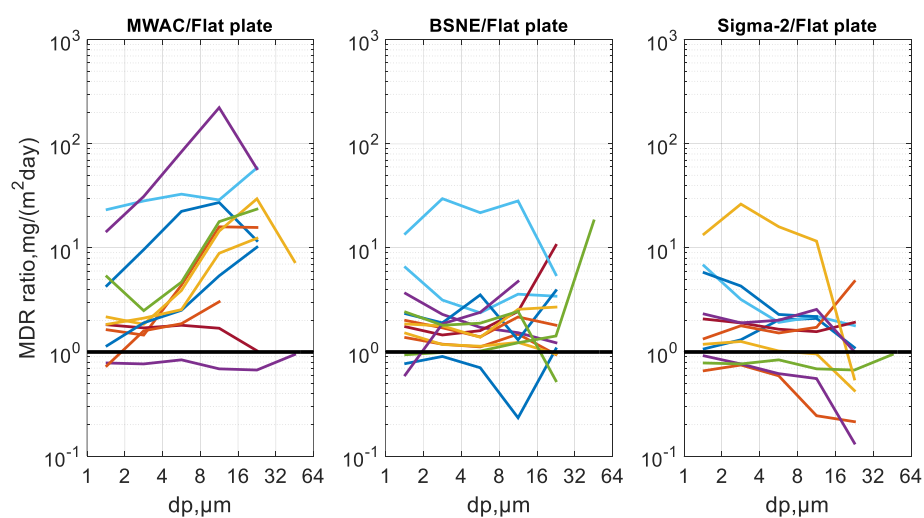

**Figure S 8:** Mass deposition rate (MDR) ratio as function of particle size (different colors show different for measurement days).

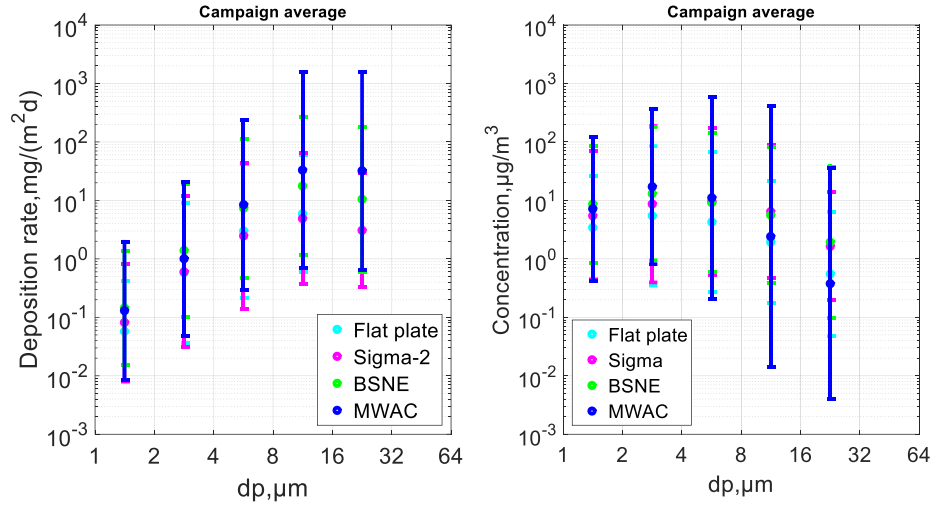

**Figure S 9:** Size-resolved mass concentration measured by different samplers (campaign data). Different deposition velocity models are used for concentration calculation (Flat plate: Piskunov; BSNE: Piskunov; MWAC: combination of Piskunov- and impaction curve). Error bars show the central 95% confidence interval.

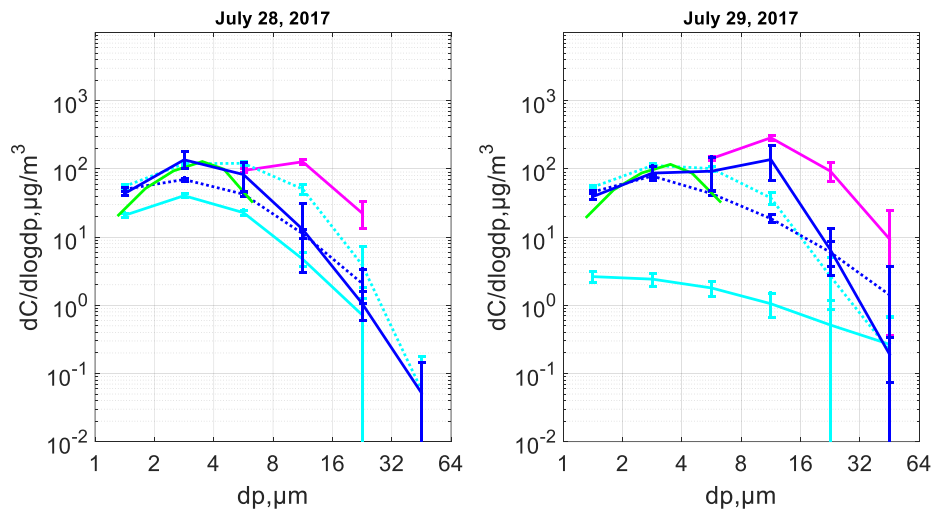

**Figure S 10:** Comparison of size resolved mass concentration measured by different samplers (a solid cyan: Flat plate; a dotted cyan: Sigma-2; solid blue: MWAC; dotted blue: BSNE with daily average mass concentration from FWI (magenta line) and OPC (green line) over different measurement days.

FWI measurement in each day is an average of three measurements taken every day (two days=6 samples).

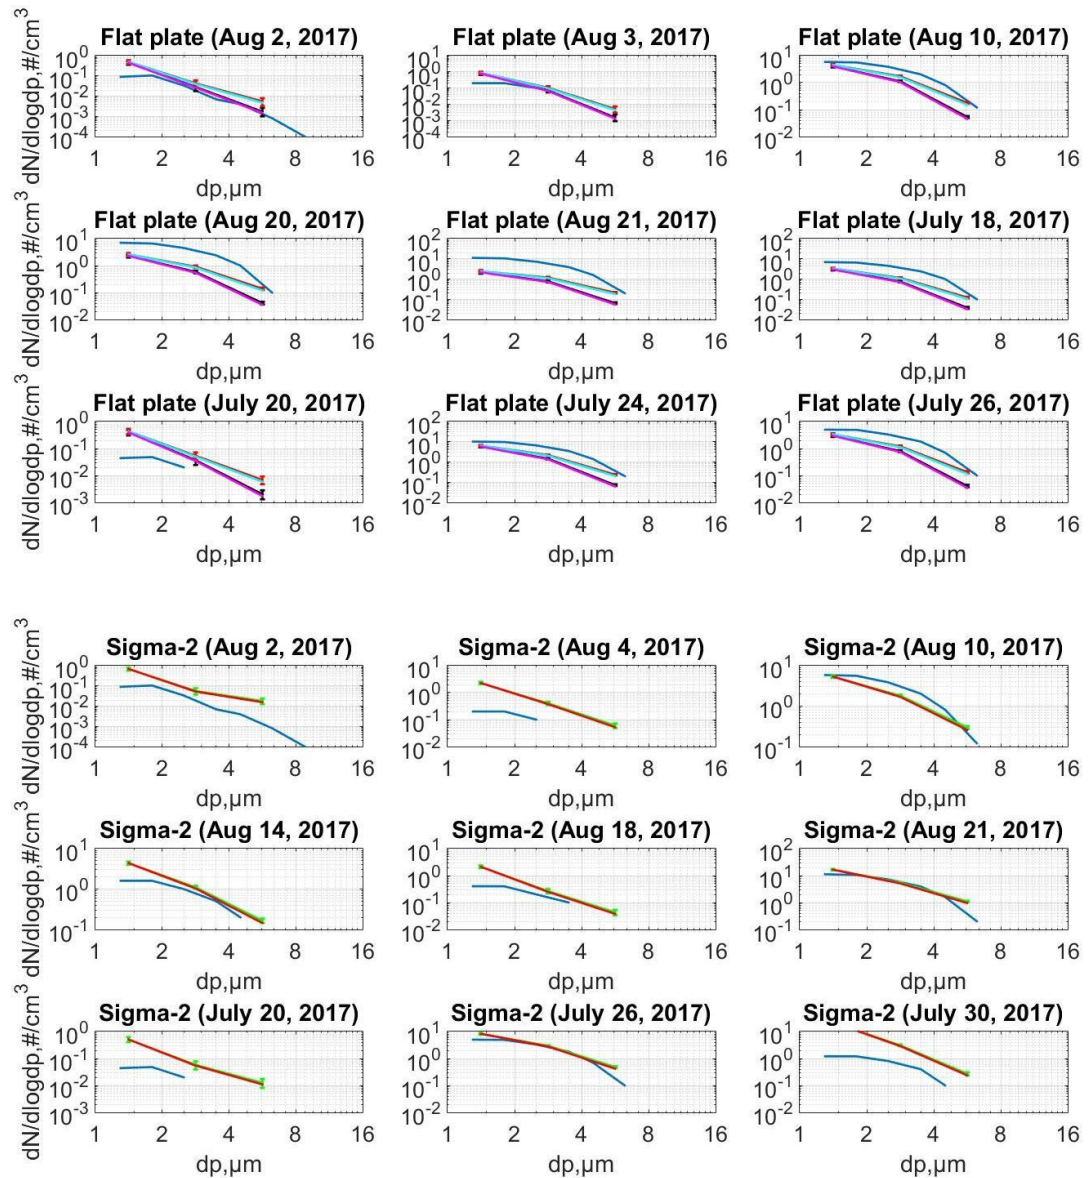

**Figure S 11:** Comparing number concentration calculated from deposition measurement (Flat plate and Sigma-2 samplers) (Red: Wood 1981; Black: Momentum flux; Cyan: Wood 1981-PM<sub>10</sub> inlet and Magenta: Momentum flux-PM<sub>10</sub> inlet) with number concentration by OPC measurement (Blue). Concentration calculation from Sigma-2 sampler considers only Stokes's velocity (without considering friction velocity) (Green: Stokes' velocity; Yellow: Stokes' velocity-PM<sub>10</sub> inlet using Stokes velocity). Error Bars show the central 95 % confidence interval.



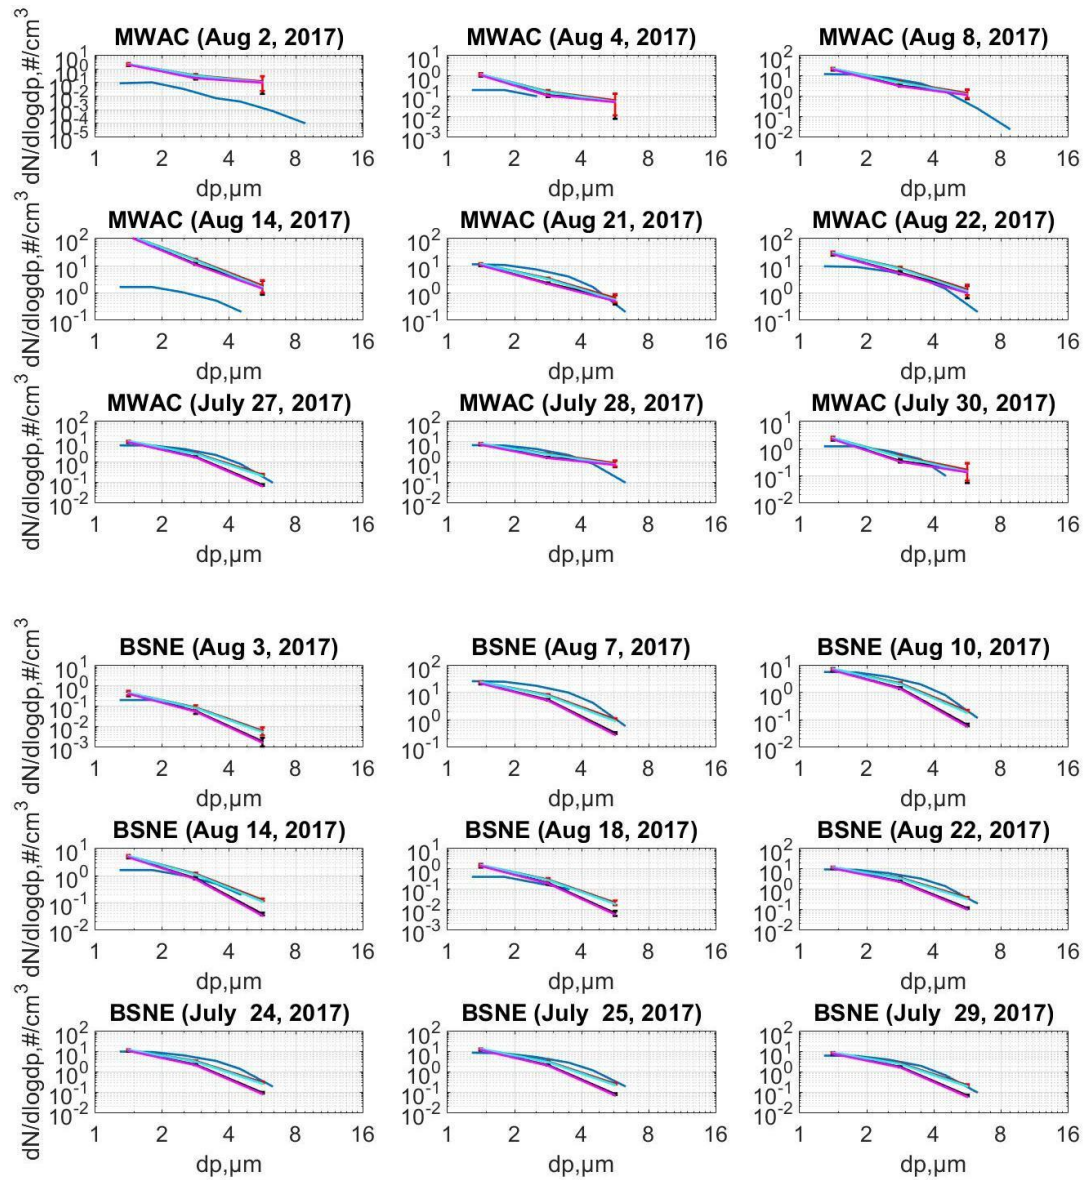

**Figure S 12:** Comparing number concentration calculated from deposition measurement (MWAC and BSNE samplers) (Red: Wood 1981; Black: Momentum flux; Cyan: Wood 1981-PM<sub>10</sub> inlet and Magenta: Momentum flux-PM<sub>10</sub> inlet) with number concentration by OPC measurement (Blue). Error Bars show the central 95 % confidence interval.

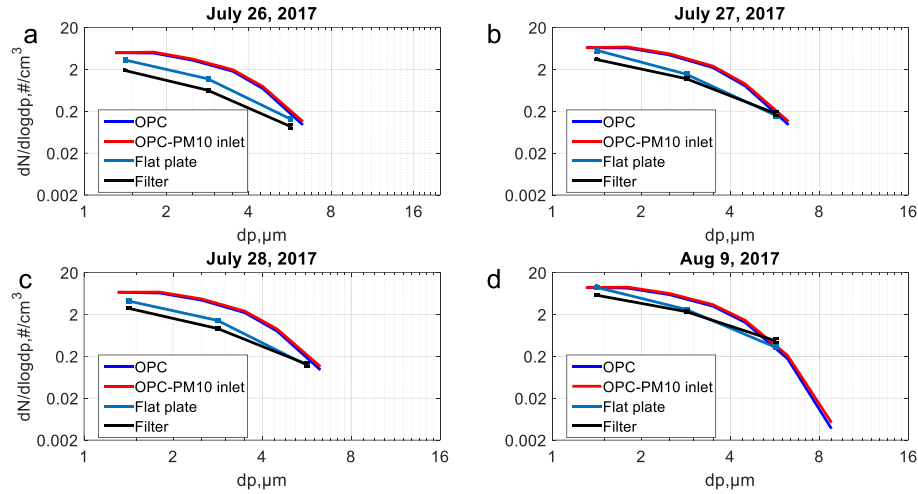

**Figure S 13:** Number concentration measured with Filter-sampler method, in comparison to Flat plate and OPC over different measurement days (a: July 26, 2017; b: July 27, 2017; c: July 28, 2017; d: July 29, 2017). Number concentration size distributions is obtained by converting the SEM obtained number deposition rate ( $\#/(\text{m}^2\text{day})$ ) to number concentration using different deposition velocity models. The red curve shows OPC with  $\text{PM}_{10}$  inlet efficiency correction. The number concentration measurement shown by filter sampler is a daily average basis. Error bars show the central 95% confidence interval.

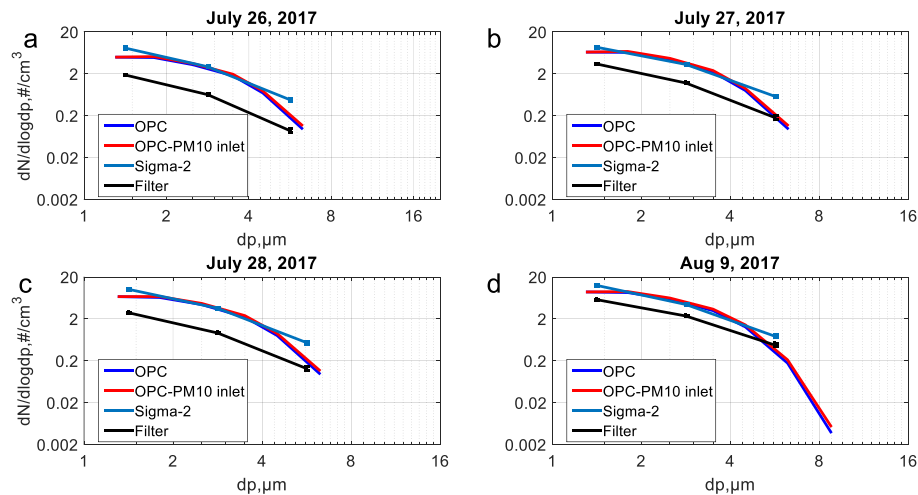



**Figure S 14:** Number concentration measured with Filter-sampler method, in comparison to Sigma-2 and OPC over different measurement days (a: July 26, 2017; b: July 27, 2017; c: July 28, 2017; d: July 29, 2017). Number concentration size distributions is obtained by converting the SEM obtained number deposition rate ( $(\#/(m^2day))$ ) to number concentration using different deposition velocity models. The red curve shows OPC with  $PM_{10}$  inlet efficiency correction. The number concentration measurement shown by filter sampler is a daily average basis. Error bars show the central 95% confidence interval.

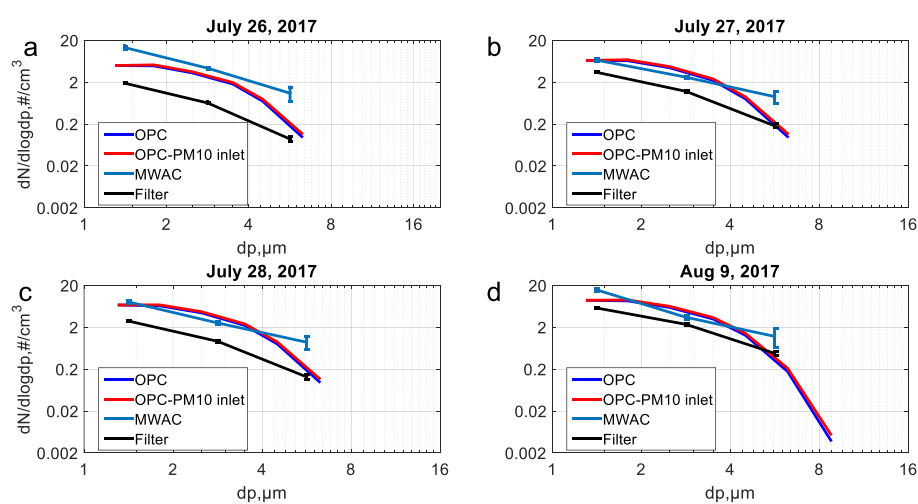

**Figure S 15:** Number concentration measured with Filter-sampler method, in comparison to MWAC and OPC over different measurement days (a: July 26, 2017; b: July 27, 2017; c: July 28, 2017; d: July 29, 2017). Number concentration size distributions is obtained by converting the SEM obtained number deposition rate ( $(\#/(m^2day))$ ) to number concentration using different deposition velocity models. The red curve shows OPC with  $PM_{10}$  inlet efficiency correction. The number concentration measurement shown by filter sampler is a daily average basis. Error bars show the central 95% confidence interval.

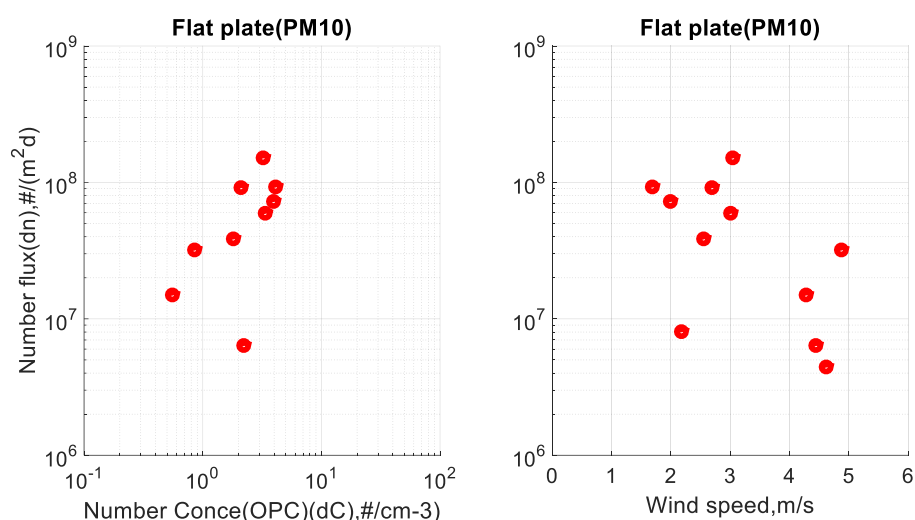

**Figure S 16:** Connection of deposition flux, OPC concentration, and meteorological factor (wind speed). (a) Number deposition rate of particles smaller than 10  $\mu\text{m}$  estimated aerodynamic diameter observed with the flat plate sampler versus number concentration of PM<sub>10</sub> observed with the OPC. (b) number deposition rate of particles smaller than 10  $\mu\text{m}$  estimated aerodynamic diameter observed with the flat plate sampler versus the average wind speed of the collection period.

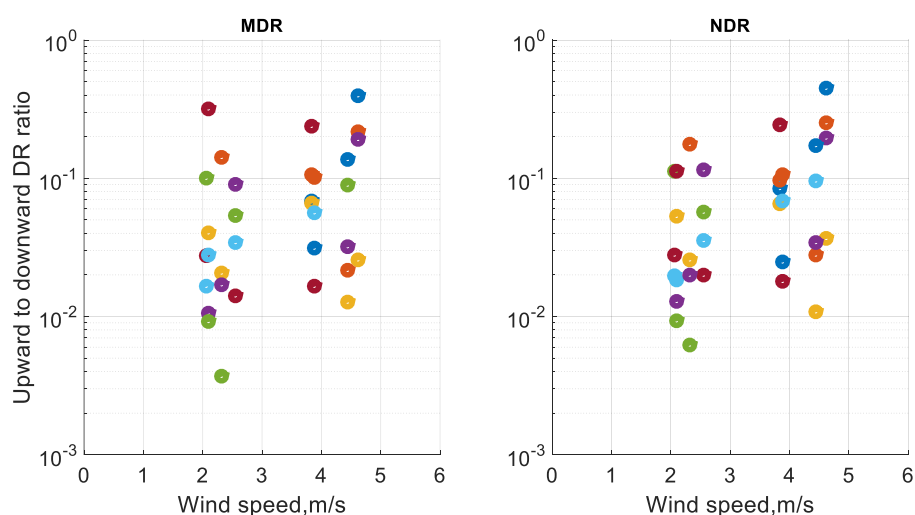

**Figure S 17:** Upward to downward deposition rate ratio vs wind speed. The deposition rates are measured using flat plate sampler (with 25 mm stub). Different colors represent different size intervals (blue: 1-2  $\mu\text{m}$ ; orange: 2-4  $\mu\text{m}$ ; yellow: 4-8  $\mu\text{m}$ ; Violet: 8-16  $\mu\text{m}$ ; green: 16-32  $\mu\text{m}$ ; cyan: 32-64  $\mu\text{m}$ ).

## 2 Computational fluid dynamics (CFD) simulation

### 2.1 Detail of the sampler construction for CFD geometries

#### 2.1.1 Flat plate sampler

The bottom part of the sampler is a cylinder with a diameter of 28.9 mm and a height of 29 mm followed by another cylinder with a diameter of 40 mm and a height of 14 mm. The first plate has a diameter of 127 mm and a thickness of 1 mm. In the middle of the area, the deposition area is defined as a circular surface with a diameter of 12 mm or 25 mm respectively. The upper plate has the same thickness but a diameter of 203.2 mm. Three columns hold the upper plate. The center of these columns is arranged on a diameter of 116 mm. The diameter of the columns is 5 mm with a height of 16 mm.

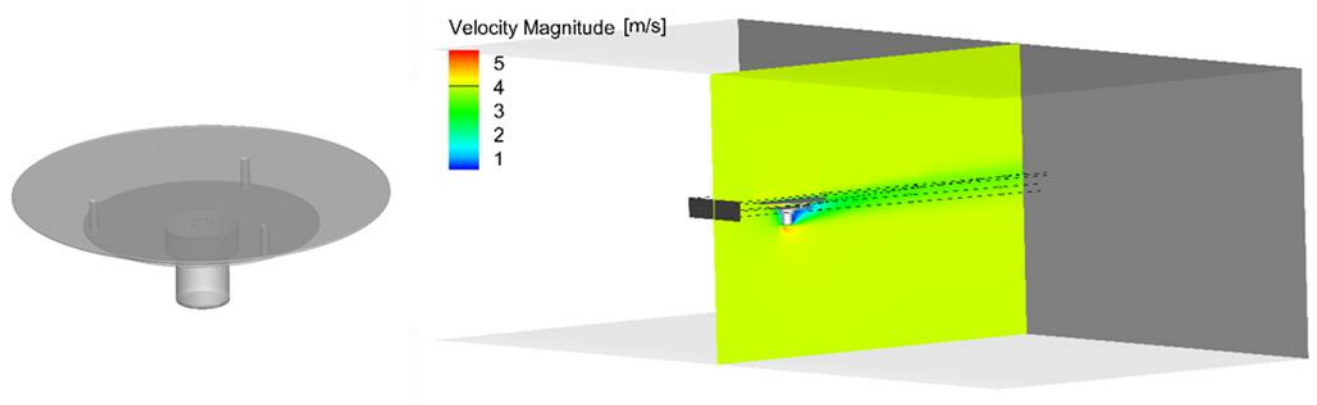

**Figure S 18:** Geometry of Flat plate sampler (left), CFD modeling domain and velocity magnitude, inlet velocity: 4m/s (right); in addition, the injection area is shown in black (width 0.2 m, height 0.05 m) along with exemplary particle trajectories.

#### 2.1.2 Sigma-2 sampler

At the bottom, it consists of a mounting pole with an inner diameter of 36 mm and an outer diameter of 50 mm with a height of 32 mm. Then follows the bottom of the sampler with a diameter of 108 mm and a height of 14 mm. The wall of the geometry has an inner diameter of 104 mm and is 260 mm high. From a height of 214 mm the cover of the sampler starts. It has an inner diameter of 154 mm and an outer diameter of 158 mm. In it, there are four openings, which start at a height of 226 mm and have a width of 40 mm and a height of 75 mm. The same openings exist in the inner radius as well however turned by 90 degrees. The collector inside the geometry has a diameter of 12 mm, a height of 13 mm and is positioned centrally at the bottom.

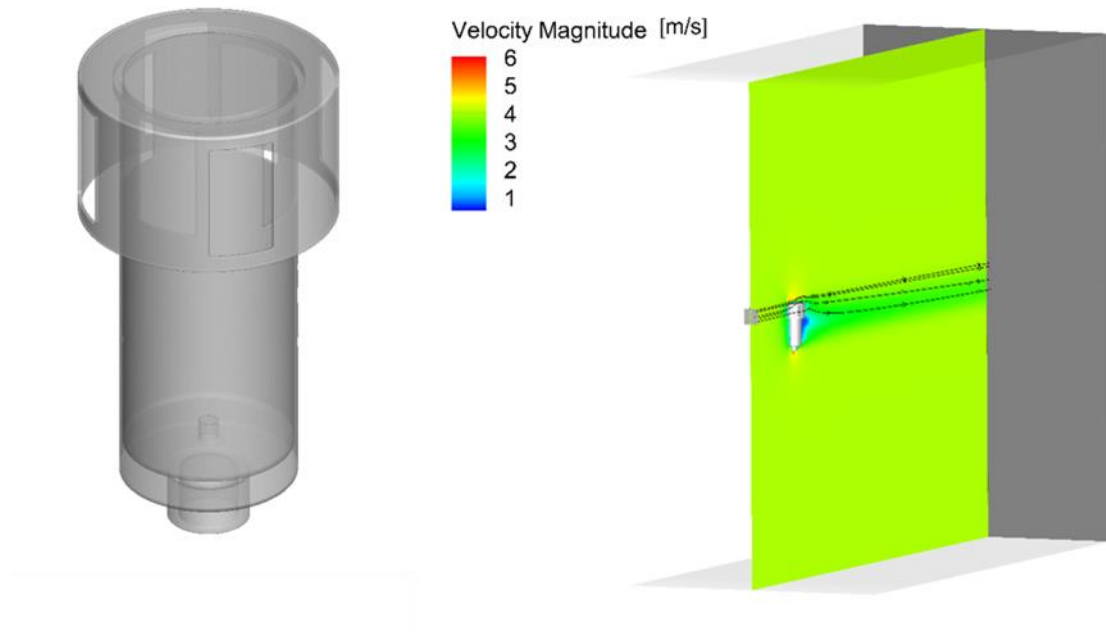

**Figure S 19:** Geometry of Sigma-2 sampler (left), CFD modeling domain and velocity magnitude; inlet velocity: 4m/s (right); in addition, the injection area is shown in black (width 0.2 m, height 0.1 m) along with exemplary particle trajectories.

### 2.1.3 MWAC sampler

The bottom diameter of the sampler is 48 mm with a thickness of 1.25 mm. Afterwards the inner diameter is 45.4 mm up to a height of 60 mm. The diameter then narrows semi circularly to 24 mm. The lid of the sampler has a diameter of 40 mm and a height of 17 mm.

The pipes have an inner diameter of 7.5 mm and a thickness of 1.25 mm. The pipe looking into the direction of the velocity inlet is longer and ends 23 mm above the bottom of the sampler. The outgoing pipe starts 38 mm above the bottom. The collector inside the geometry has a diameter of 12 mm, a height of 13 mm and is positioned centrally at the bottom.

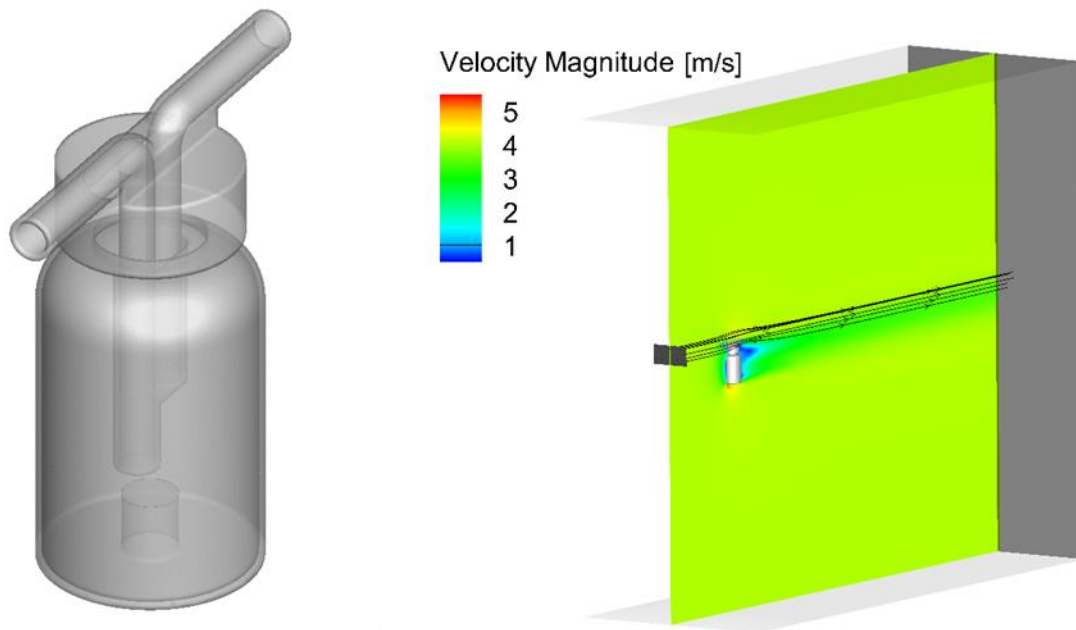

**Figure S 20:** Geometry of MWAC sampler (left), CFD modeling domain and velocity magnitude of MWAC sampler, inlet velocity: 4m/s (right); in addition, the injection area is shown in black (width 0.1 m, height 0.05 m) along with exemplary particle trajectories.

## 2.2 Results in the cross section of the flow domain

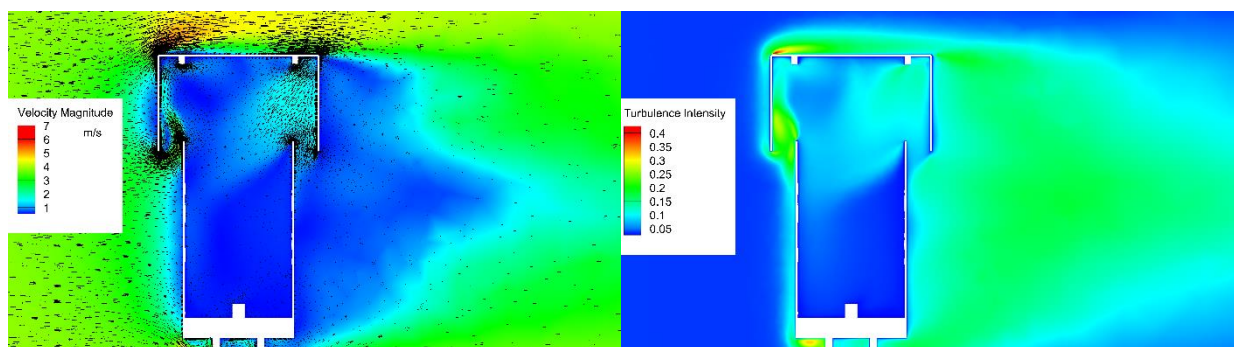

**Figure S 21:** Sigma-2 Sampler: Velocity magnitude and turbulence intensity at wind speed 4 m/s.

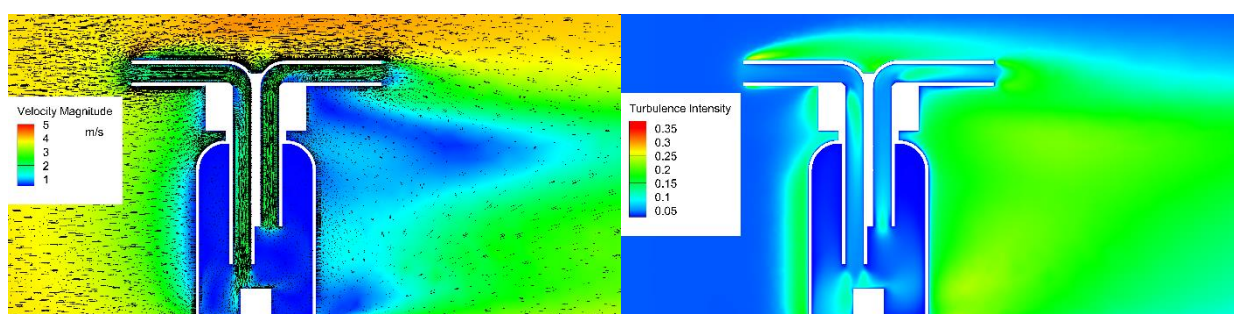

**Figure S 22:** MWAC Sampler: Velocity magnitude and turbulence intensity at wind speed 4 m/s.

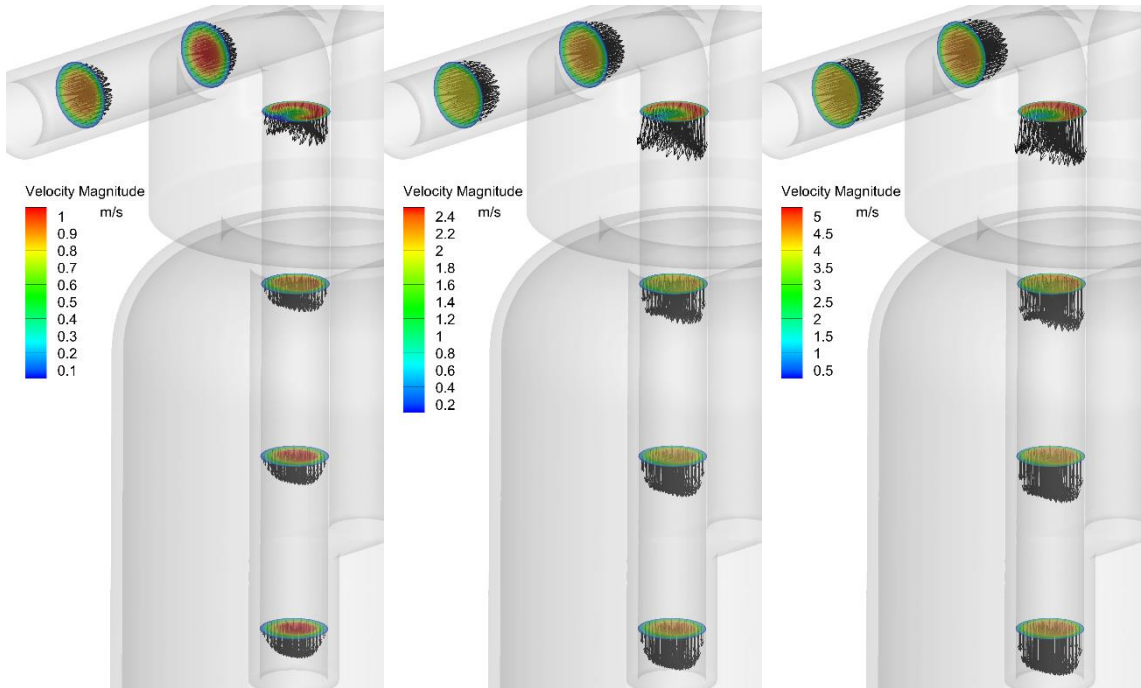

**Figure S 23:** Velocity vectors at 2, 4 and 8 m/s (cross sections across and along the inlet tube).

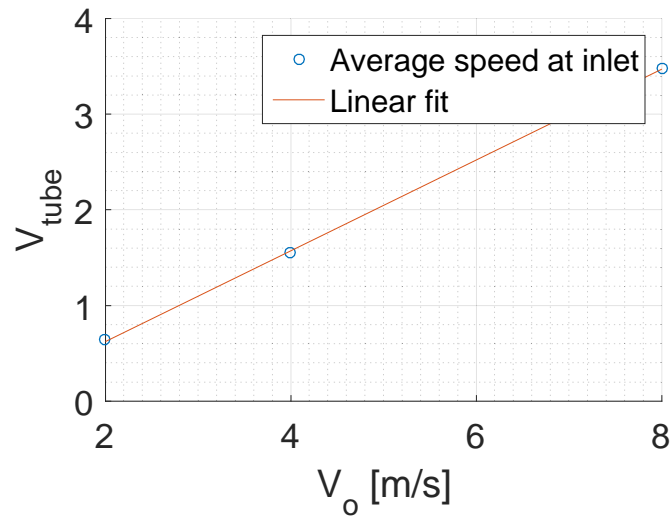

**Figure S 24:** Mean flow velocity ( $V_{tube}$ ) in the MWAC tube as a function of the outside velocity ( $V_o$ ).

Fitting curve:  $V_{tube} = 0.47V_o - 0.33$  for the range 2 – 8 m/s.

## 2.3 CFD-derived deposition velocities at different wind speed

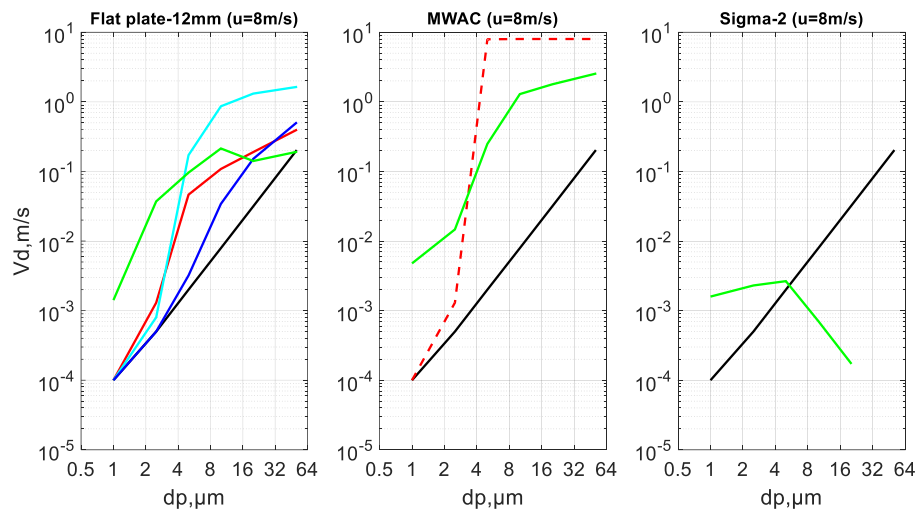

**Figure S 25:** Comparison of the CFD- derived deposition velocities of particles for different passive samplers to the analytical deposition velocity models used for the different samplers (at 8 m/s wind speed).

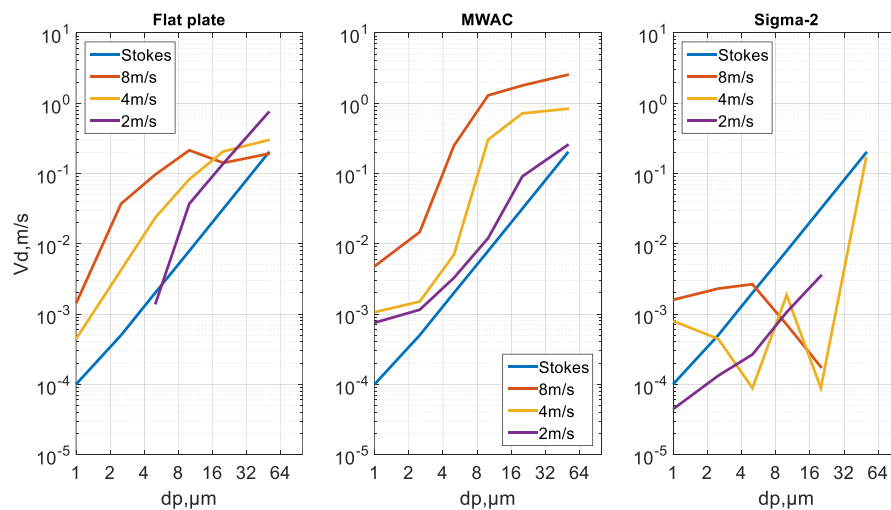

**Figure S 26:** Comparing the CFD-derived particle deposition velocities at at different wind speed values for different samplers.
