# Supplementary material for: Field comparison of dry deposition samplers for collection of atmospheric mineral dust: results from single-particle characterization
Source: Copernicus journal article supplement (doi:10.5194/amt-2019-187), 2019-05-14
Supplement: Supplementary file [file amt-2019-187-RC2-supplement.pdf]

Dry deposition, as an important processes which determines lifetimes and impacts of aerosol particles, is not well understood, and one reason is that measurement of aerosol dry deposition is difficult and suffers from large uncertainties. Waza et al. collected mineral dust particles using several dry deposition samplers and characterized these particles using SEM, and carried out CFD simulations to further understand the performance of these samplers. The topic is clearly very important, and the work has been carried out in a comprehensive manner. However, the manuscript is not well written, tedious and hard to follow. Overall I feel it is more like a chapter (or a few chapters) of a thesis. The manuscript should be restructured and edited before it is recommended for final publication. I give a few example below to show how I think the manuscript can be improved.

I feel there are too many figures used in the manuscript. For example, Fig. 4-7 present CFD results, and do they have to be included in the manuscript? Can some of them be moved into the supplement? There are only three points in Fig. 8, and so is it necessary to have this figure?

Line 457-460: Figure 13 is mentioned before Figure 10, and it took me a while to find Figure 13. In addition, can Fig. 13 be moved to supplement?

Line 553-554, line 651, line 641-642, and etc.: Quite frequently there are paragraphs which contain 1-2 short sentences. This makes the manuscript very fragmented and hard to follow.

Line 38: The paper by Jickells et al. (2005) in fact discusses the effect of mineral dust on oceanic biogeochemistry and thus should not be cited here. Instead, it should be cited in line 40-41. In addition, please consider citing new references instead of papers which were published >20 years ago.

Line 13: change “As result” to “As a result”; Line 42: change “is ranging” to “ranging”; Line 56: change “on addition” to “in addition”; line 84: change “station shields” to “station, shields”. There are many grammatical errors and awkward sentences in the manuscript, and careful editing of the manuscript is needed.
